# Supplementary material for: Synthesis and characterization of ethyl benzotriazolyl acrylate-based D–π–A fluorophores for live cell-based imaging applications
Source: Royal Society of Chemistry journal article supplement (doi:10.1039/c9ra00108e), 2019-01-01
Supplement: c9ra00108e1.pdf [file c9ra00108e1.pdf]

## Electronic Supplementary Information (ESI)

### Synthesis and characterization of ethyl benzotriazolyl acrylate-based D- $\pi$ -A fluorophores for live cell-based imaging applications

Ana Sofia Ortega-Villarreal,<sup>a</sup> Eugenio Hernández-Fernández,<sup>a\*</sup> Christopher Jensen,<sup>b</sup> Gabriel A. Valdivia-Berroeta,<sup>b</sup> Samuel Garrard,<sup>b</sup> Israel López,<sup>a,c</sup> Stacey J. Smith,<sup>b</sup> Kenneth A. Christensen,<sup>b</sup> Miguel A. Reyes-González,<sup>a</sup> David J. Michaelis<sup>b\*</sup>

<sup>a</sup>Universidad Autónoma de Nuevo León, Facultad de Ciencias Químicas, Pedro de Alba s/n, Ciudad Universitaria, 66400, San Nicolás de los Garza, Nuevo León, México

<sup>b</sup>Department of Chemistry and Biochemistry, Brigham Young University, 84602, Provo, Utah, United States

<sup>c</sup>Universidad Autónoma de Nuevo León, UANL, Centro de Investigación en Biotecnología y Nanotecnología (CIBYN), Laboratorio de Nanociencias y Nanotecnología, Autopista al Aeropuerto Internacional Mariano Escobedo Km. 10, Parque de Investigación e Innovación Tecnológica (PIIT) 66629 Apodaca, Nuevo León, México.

Content:

**Fig S1.**  $^1\text{H}$  NMR spectrum ( $\text{CDCl}_3$ ) of **6a** derivative

**Fig S2.**  $^{13}\text{C}$  NMR spectrum ( $\text{CDCl}_3$ ) of **6a** derivative

**Fig S3.**  $^1\text{H}$  NMR spectrum ( $\text{CDCl}_3$ ) of **6b** derivative

**Fig S4.**  $^{13}\text{C}$  NMR spectrum ( $\text{CDCl}_3$ ) of **6b** derivative

**Fig S5.**  $^1\text{H}$  NMR spectrum ( $\text{CDCl}_3$ ) of **6c** derivative

**Fig S6.**  $^{13}\text{C}$  NMR spectrum ( $\text{CDCl}_3$ ) of **6c** derivative

**Fig S7.**  $^1\text{H}$  NMR spectrum ( $\text{CDCl}_3$ ) of **6d** derivative

**Fig S8.**  $^{13}\text{C}$  NMR spectrum ( $\text{CDCl}_3$ ) of **6d** derivative

**Fig S9.**  $^1\text{H}$  NMR spectrum ( $\text{CDCl}_3$ ) of **7a** derivative

**Fig S10.**  $^{13}\text{C}$  NMR spectrum ( $\text{CDCl}_3$ ) of **7a** derivative

**Fig S11.**  $^1\text{H}$  NMR spectrum ( $\text{CDCl}_3$ ) of **7b** derivative

**Fig S12.**  $^{13}\text{C}$  NMR spectrum ( $\text{CDCl}_3$ ) of **7b** derivative

**Fig S13.**  $^1\text{H}$  NMR spectrum ( $\text{CDCl}_3$ ) of **7c** derivative

**Fig S14.**  $^{13}\text{C}$  NMR spectrum ( $\text{CDCl}_3$ ) of **7c** derivative

**Fig S15.**  $^1\text{H}$  NMR spectrum ( $\text{CDCl}_3$ ) of **7d** derivative

**Fig S16.**  $^{13}\text{C}$  NMR spectrum ( $\text{CDCl}_3$ ) of **7d** derivative

**Fig S17.** Single-crystal X-ray analysis of **6a** derivative (CCDC 1882468)

**Table S1.** Atomic coordinates ( $\times 10^4$ ) and equivalent isotropic displacement parameters ( $\text{\AA}^2 \times 10^3$ ) for **6a** derivative.  $U(\text{eq})$  is defined as one third of the trace of the orthogonalized  $U^{ij}$  tensor.

**Table S2.** Bond lengths [ $\text{\AA}$ ] and angles [ $^\circ$ ] of **6a** derivative.

**Table S3.** Anisotropic displacement parameters ( $\text{\AA}^2 \times 10^3$ ) for **6a** derivative. The anisotropic displacement factor exponent takes the form:  $-2\pi^2 [h^2 a^{*2} U^{11} + \dots + 2 h k a^* b^* U^{12}]$ .

**Table S4.** Hydrogen coordinates ( $\times 10^4$ ) and isotropic displacement parameters ( $\text{\AA}^2 \times 10^3$ ) for **6a** derivative.

**Fig S18.** Single-crystal X-ray analysis of **7a** derivative (CCDC 1867840)

**Table S5.** Atomic coordinates ( $\times 10^4$ ) and equivalent isotropic displacement parameters ( $\text{\AA}^2 \times 10^3$ ) for **7a** derivative.  $U(\text{eq})$  is defined as one third of the trace of the orthogonalized  $U^{\text{ij}}$  tensor.

**Table S6.** Bond lengths [ $\text{\AA}$ ] and angles [ $^\circ$ ] for **7a** derivative.

**Table S7.** Anisotropic displacement parameters ( $\text{\AA}^2 \times 10^3$ ) for **7a** derivative. The anisotropic displacement factor exponent takes the form:  $-2\pi^2[h^2 a^{*2}U^{11} + \dots + 2 h k a^* b^* U^{12}]$ .

**Table S8.** Hydrogen coordinates ( $\times 10^4$ ) and isotropic displacement parameters ( $\text{\AA}^2 \times 10^3$ ) for **7a** derivative.

**Fig S19.** Single-crystal X-ray analysis of **7d** derivative (CCDC 1882467)

**Table S9.** Atomic coordinates ( $\times 10^4$ ) and equivalent isotropic displacement parameters ( $\text{\AA}^2 \times 10^3$ ) for **7d** derivative.  $U(\text{eq})$  is defined as one third of the trace of the orthogonalized  $U^{\text{ij}}$  tensor.

**Table S10.** Bond lengths [ $\text{\AA}$ ] and angles [ $^\circ$ ] for **7d** derivative.

**Table S11.** Anisotropic displacement parameters ( $\text{\AA}^2 \times 10^3$ ) for **7d** derivative. The anisotropic displacement factor exponent takes the form:  $-2\pi^2[h^2 a^{*2}U^{11} + \dots + 2 h k a^* b^* U^{12}]$ .

**Table S12.** Hydrogen coordinates ( $\times 10^4$ ) and isotropic displacement parameters ( $\text{\AA}^2 \times 10^3$ ) for **7d** derivatives.

**Fig S20.** Absorption spectra of **6b** derivative

**Fig S21.** Absorption and emission spectra of **6a** derivative in (solid line) methanol and (dot line) DMSO solution

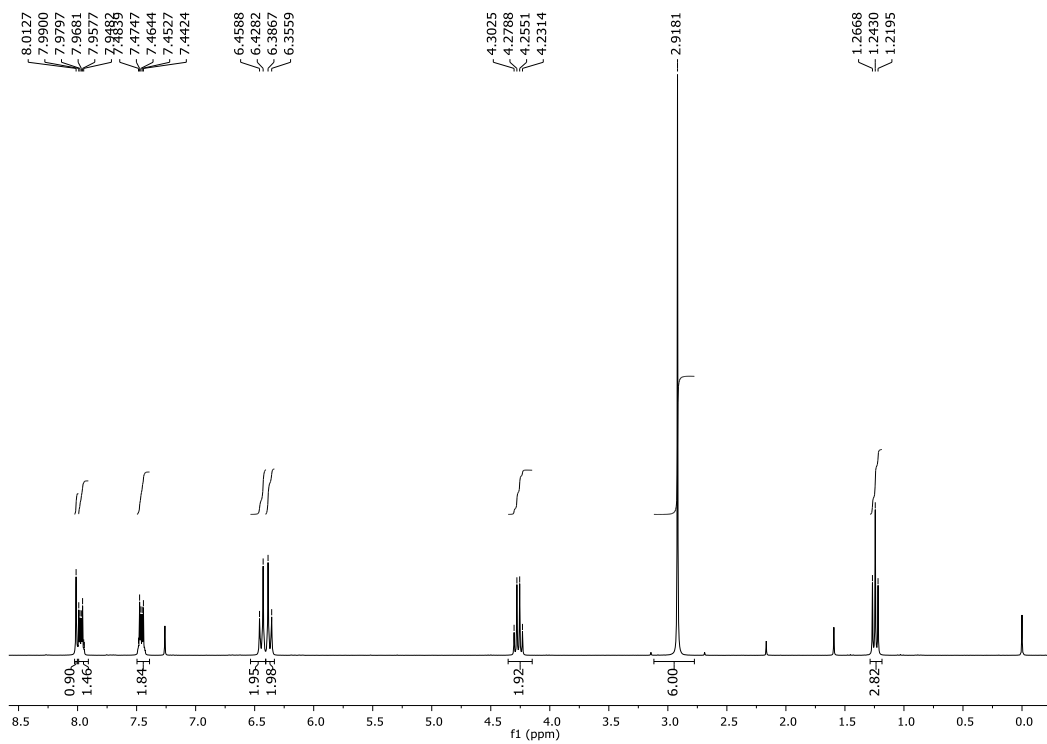

**Fig S3.**  $^1\text{H}$  NMR spectrum ( $\text{CDCl}_3$ ) of **6a** derivative

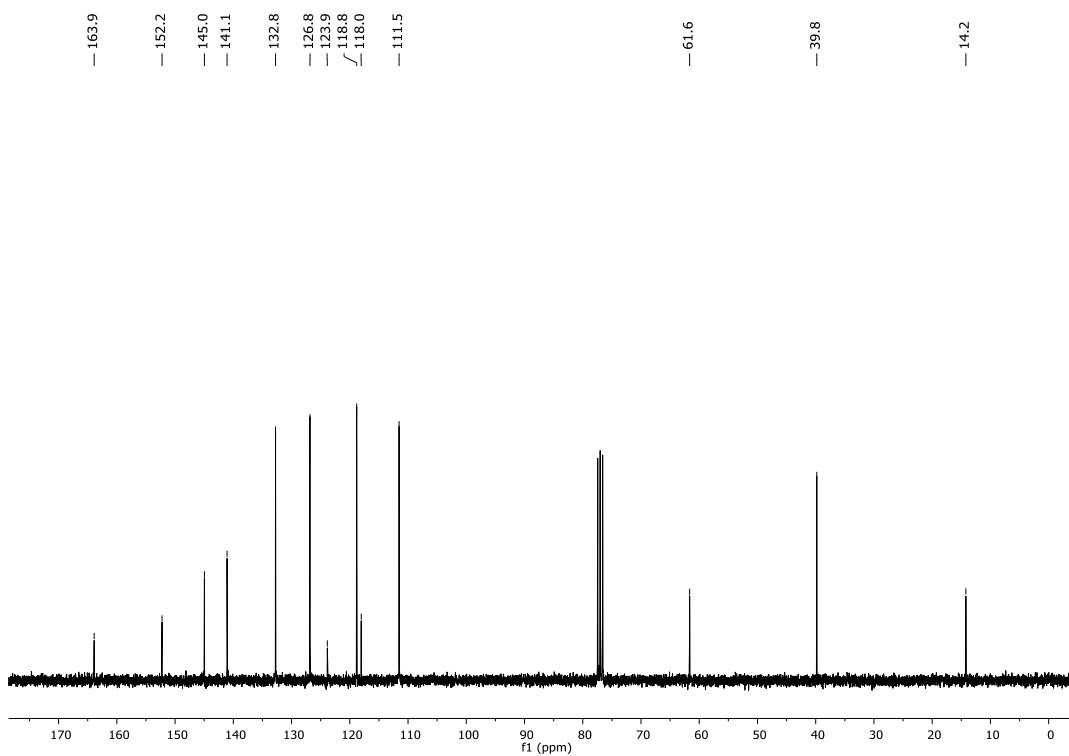

**Fig S4.**  $^{13}\text{C}$  NMR spectrum ( $\text{CDCl}_3$ ) of **6a** derivative

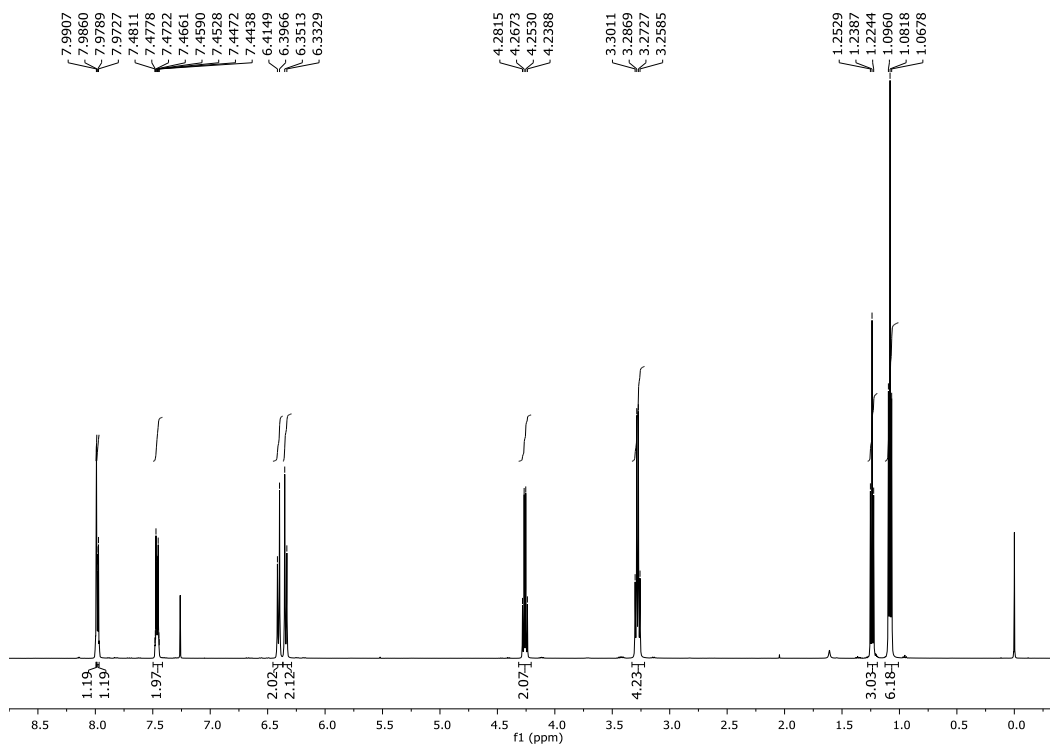

**Fig S5.**  $^1\text{H}$  NMR spectrum ( $\text{CDCl}_3$ ) of **6b** derivative

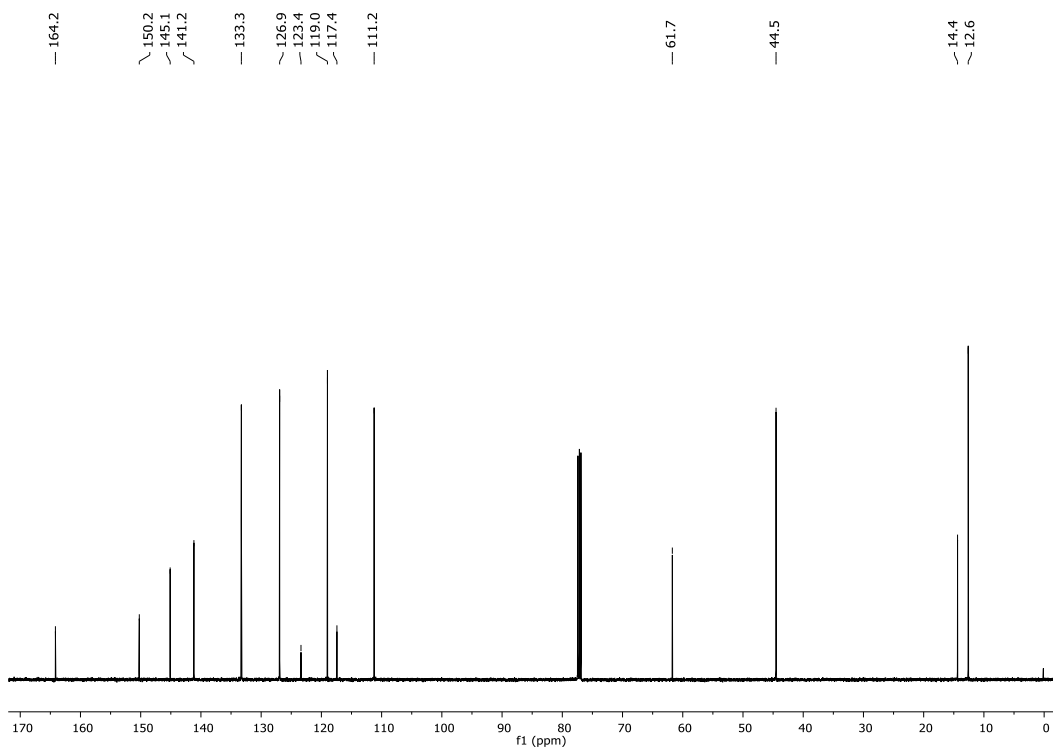

**Fig S6.**  $^{13}\text{C}$  NMR spectrum ( $\text{CDCl}_3$ ) of **6b** derivative

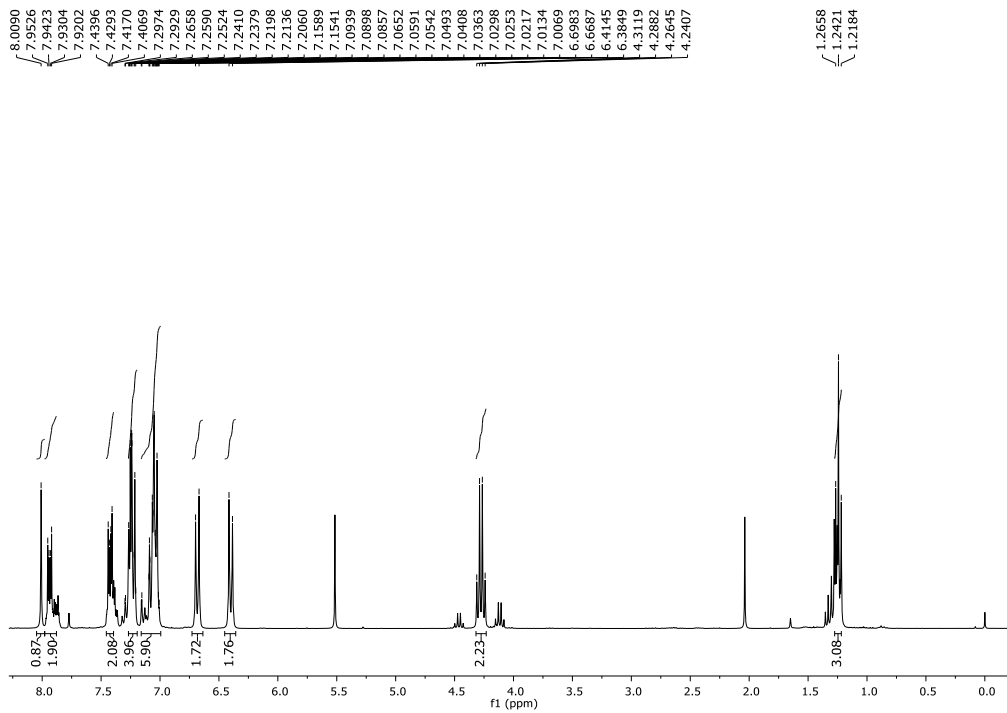

**Fig S7.**  $^1\text{H}$  NMR spectrum ( $\text{CDCl}_3$ ) of **6c** derivative

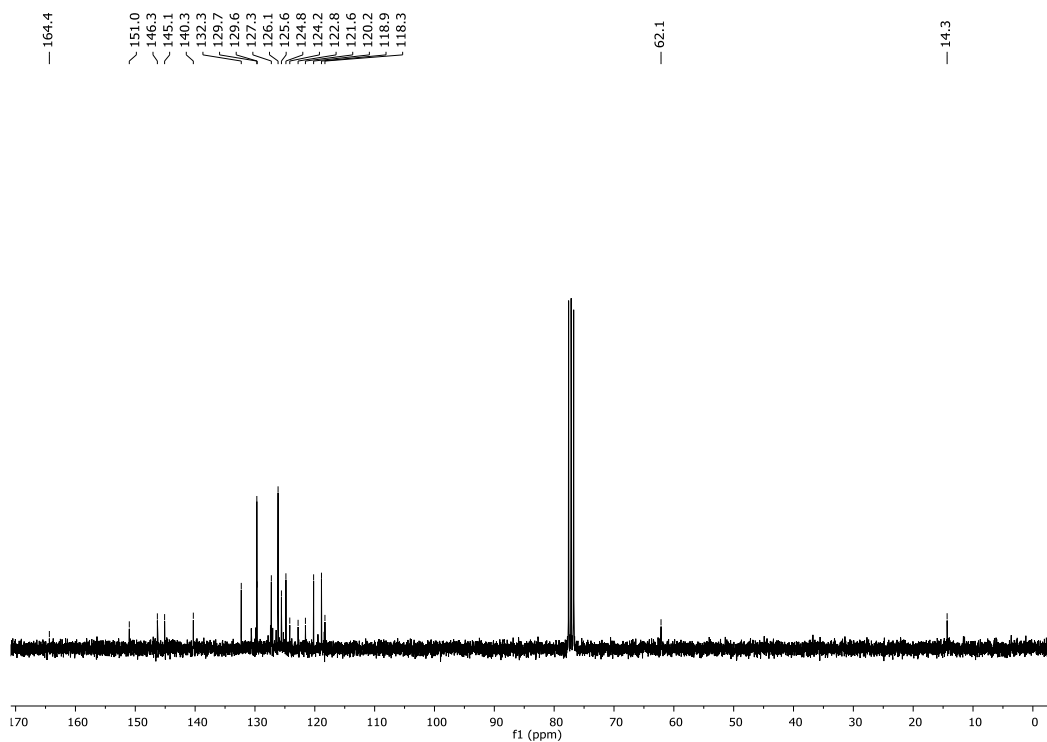

**Fig S8.**  $^{13}\text{C}$  NMR spectrum ( $\text{CDCl}_3$ ) of **6c** derivative

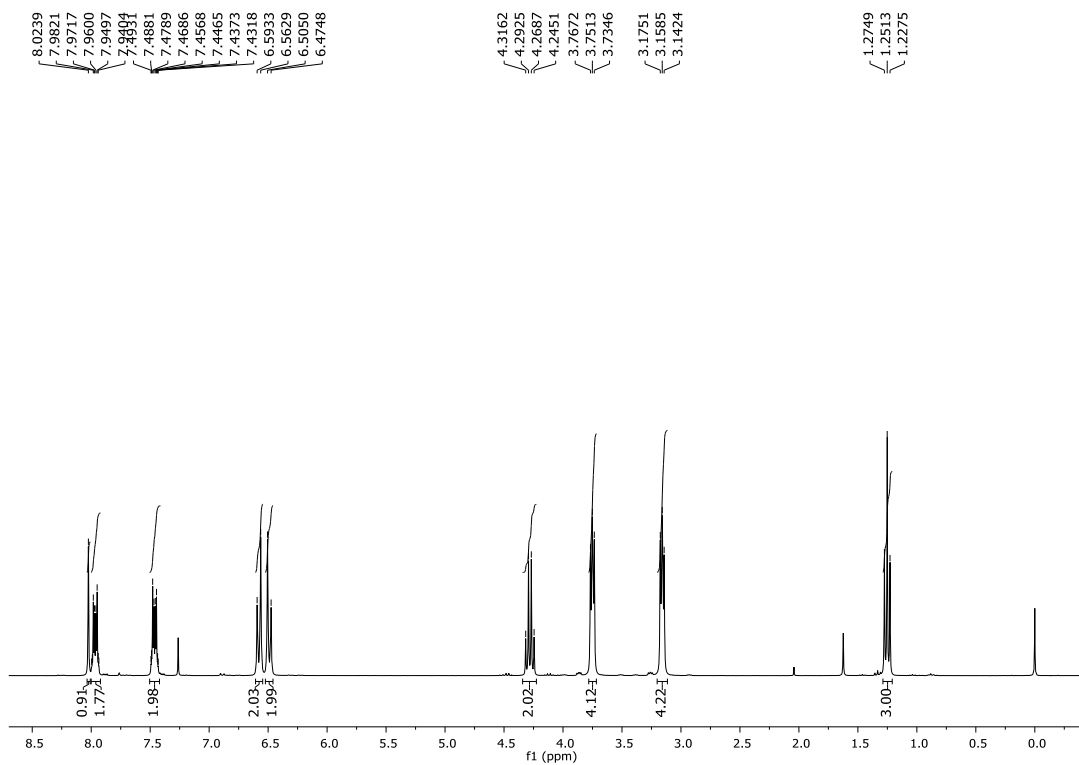

**Fig S9.**  $^1\text{H}$  NMR spectrum ( $\text{CDCl}_3$ ) of **6d** derivative

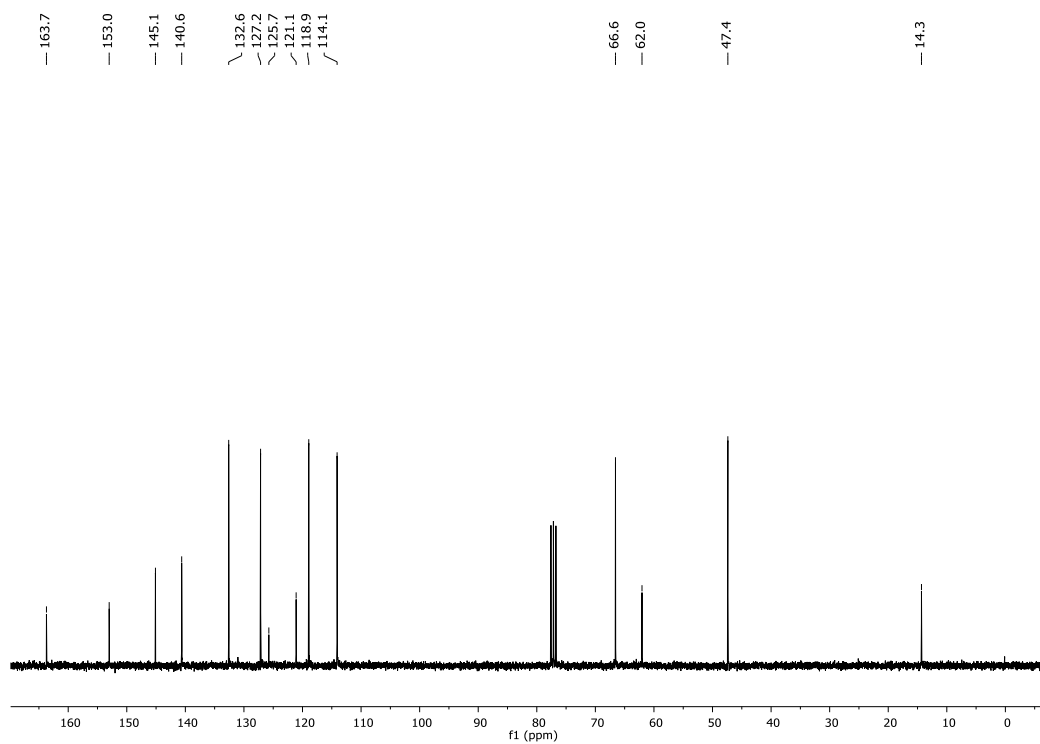

**Fig S10.**  $^{13}\text{C}$  NMR spectrum ( $\text{CDCl}_3$ ) of **6d** derivative

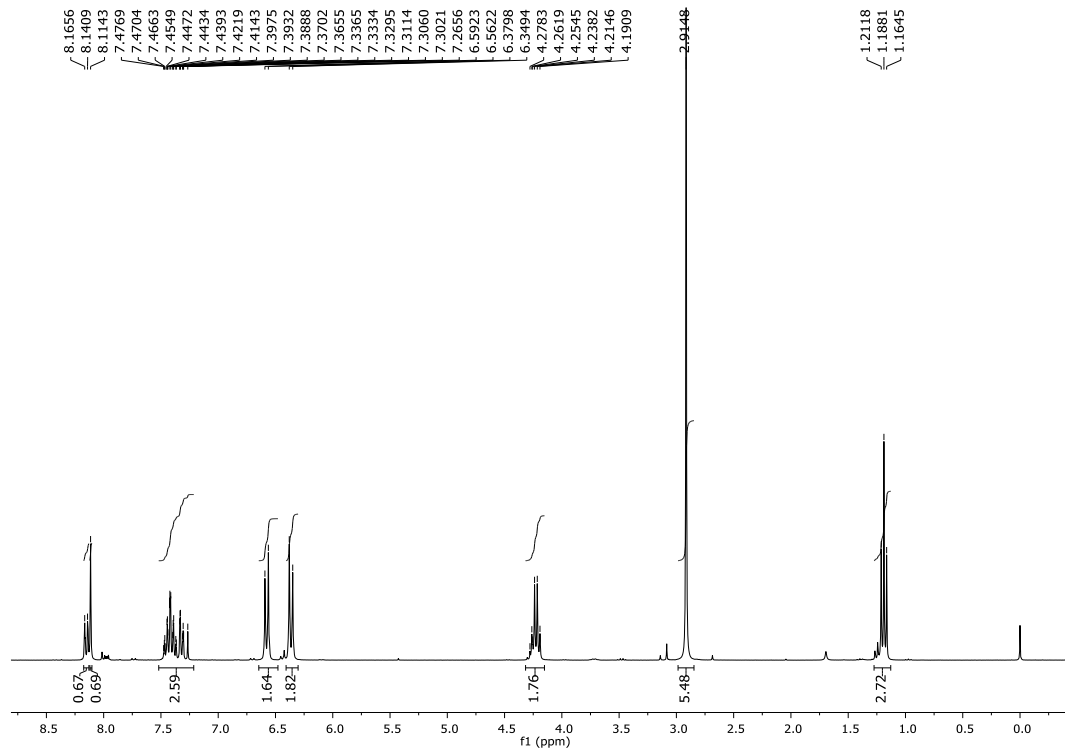

**Fig S11.**  $^1\text{H}$  NMR spectrum ( $\text{CDCl}_3$ ) of **7a** derivative

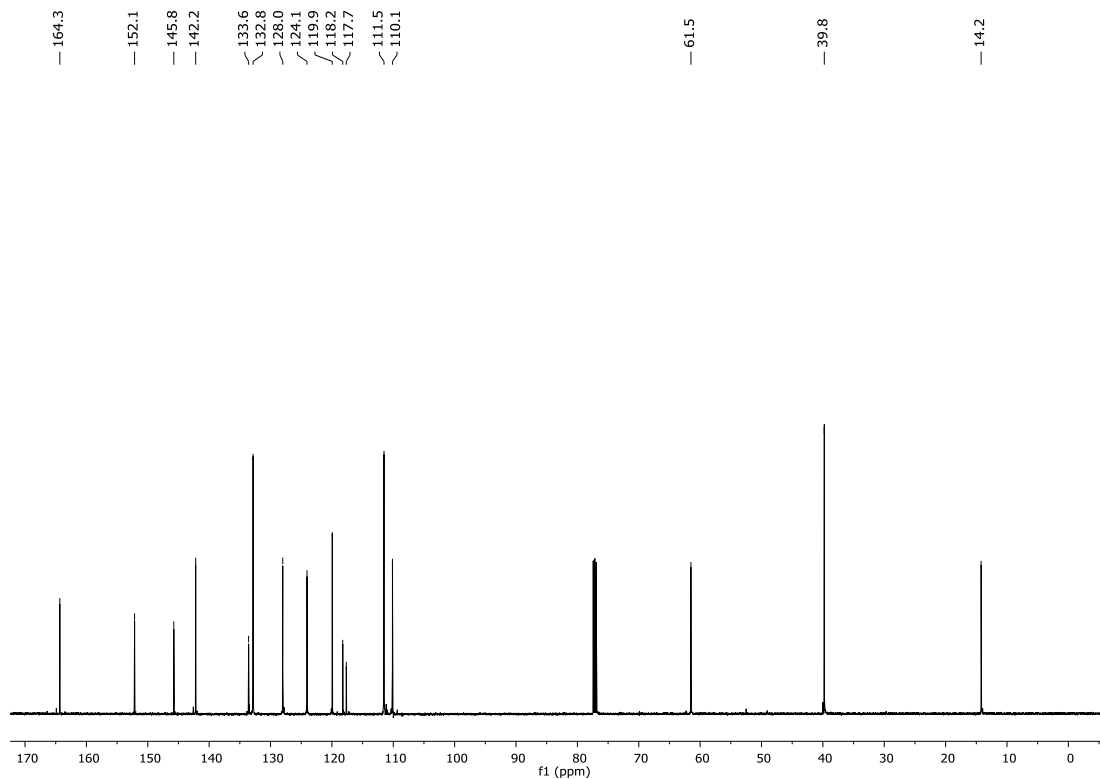

**Fig S12.**  $^{13}\text{C}$  NMR spectrum ( $\text{CDCl}_3$ ) of **7a** derivative



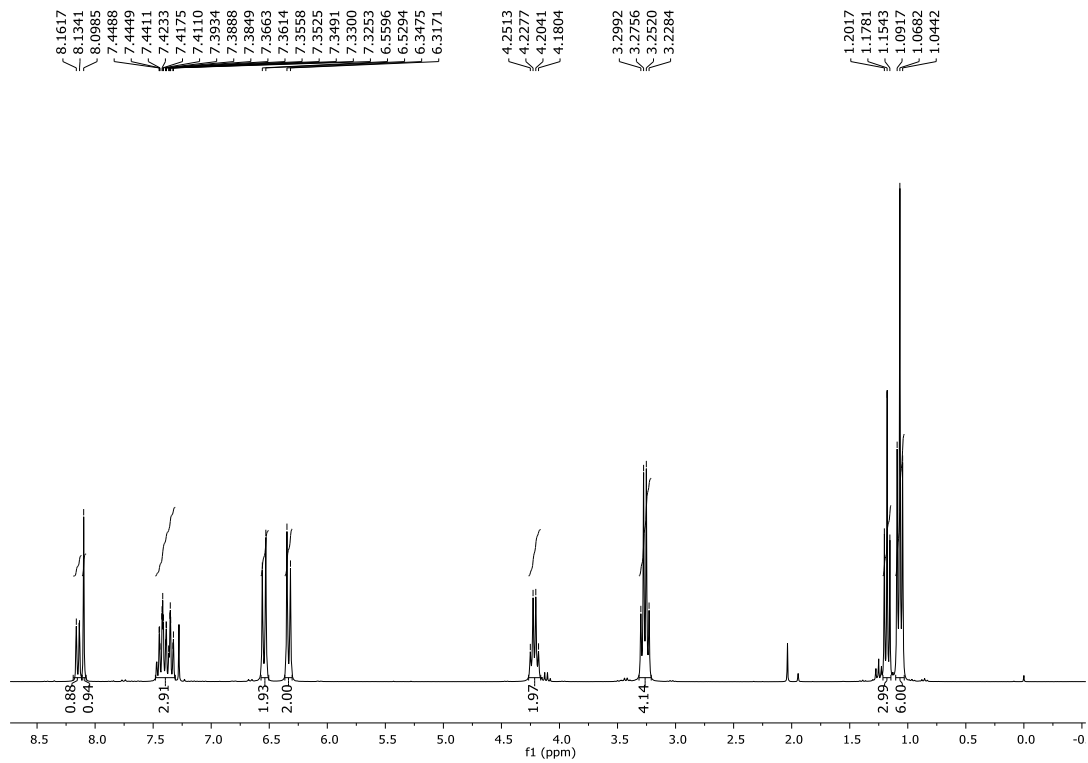

**Fig S13.**  $^1\text{H}$  NMR spectrum ( $\text{CDCl}_3$ ) of **7b** derivative

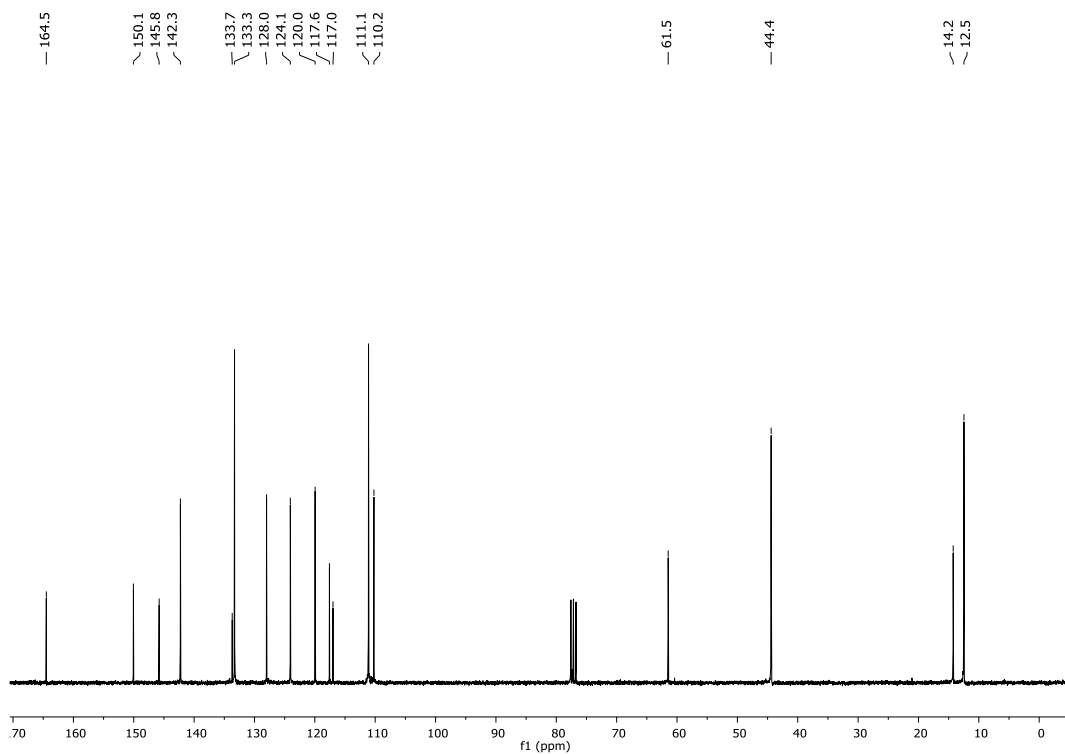

**Fig S14.**  $^{13}\text{C}$  NMR spectrum ( $\text{CDCl}_3$ ) of **7b** derivative

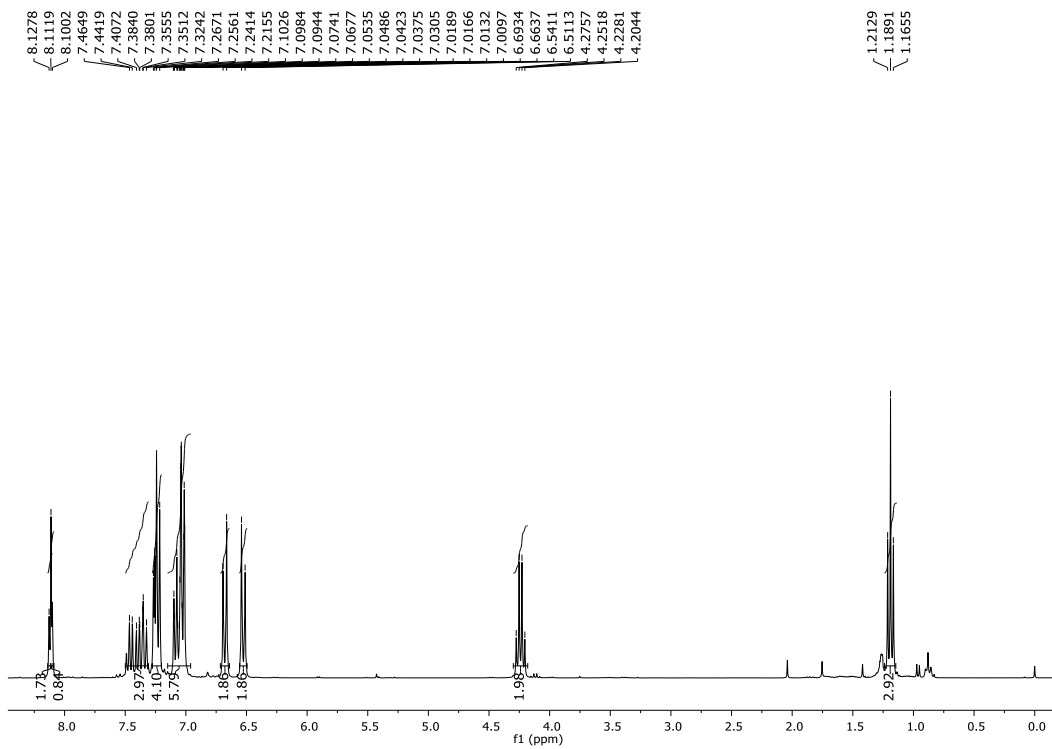

**Fig S15.**  $^1\text{H}$  NMR spectrum ( $\text{CDCl}_3$ ) of **7c** derivative

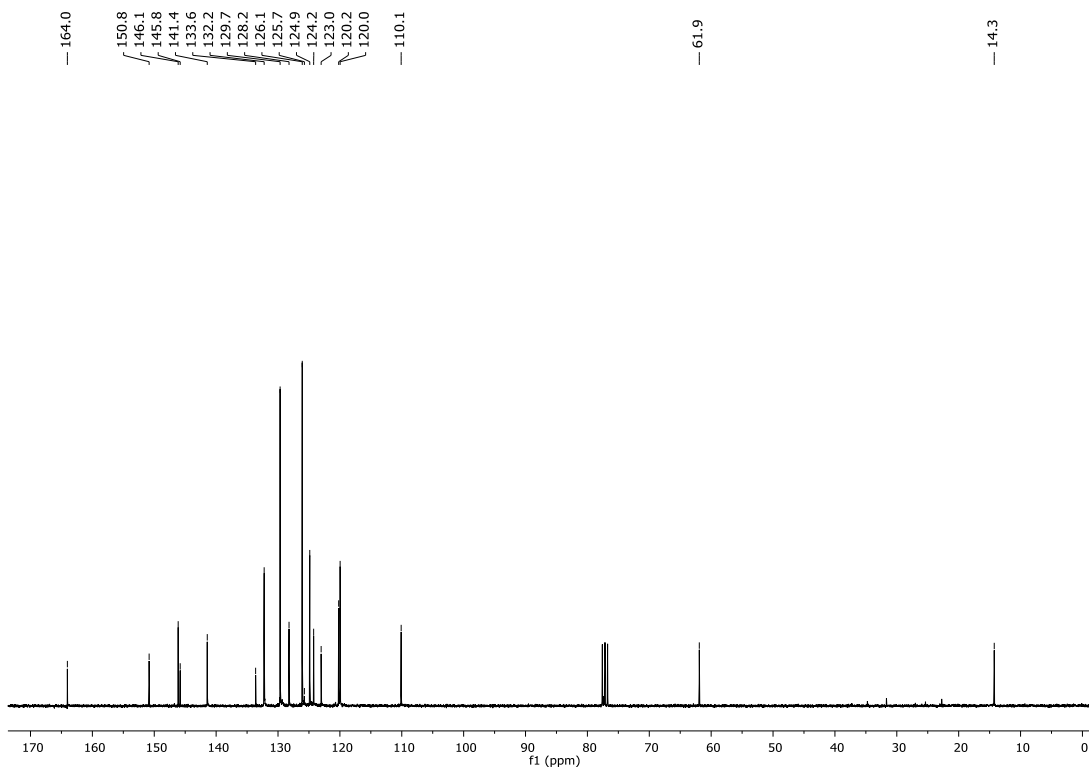

**Fig S16.**  $^{13}\text{C}$  NMR spectrum ( $\text{CDCl}_3$ ) of **7c** derivative

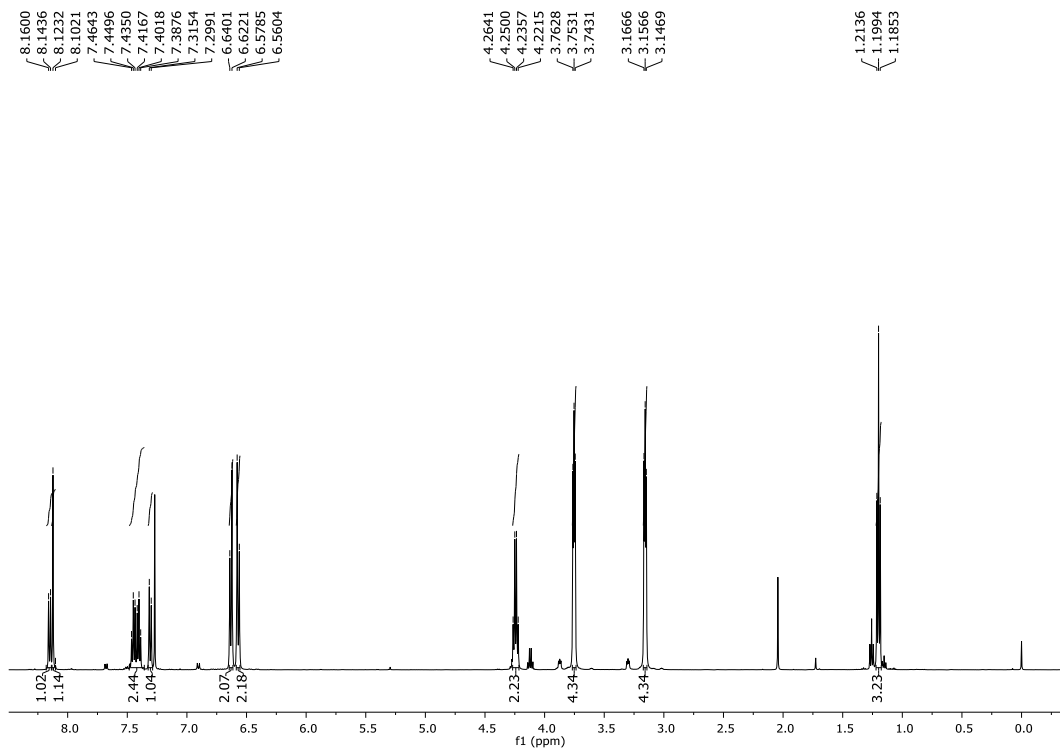

**Fig S17.**  $^1\text{H}$  NMR spectrum ( $\text{CDCl}_3$ ) of **7d** derivative

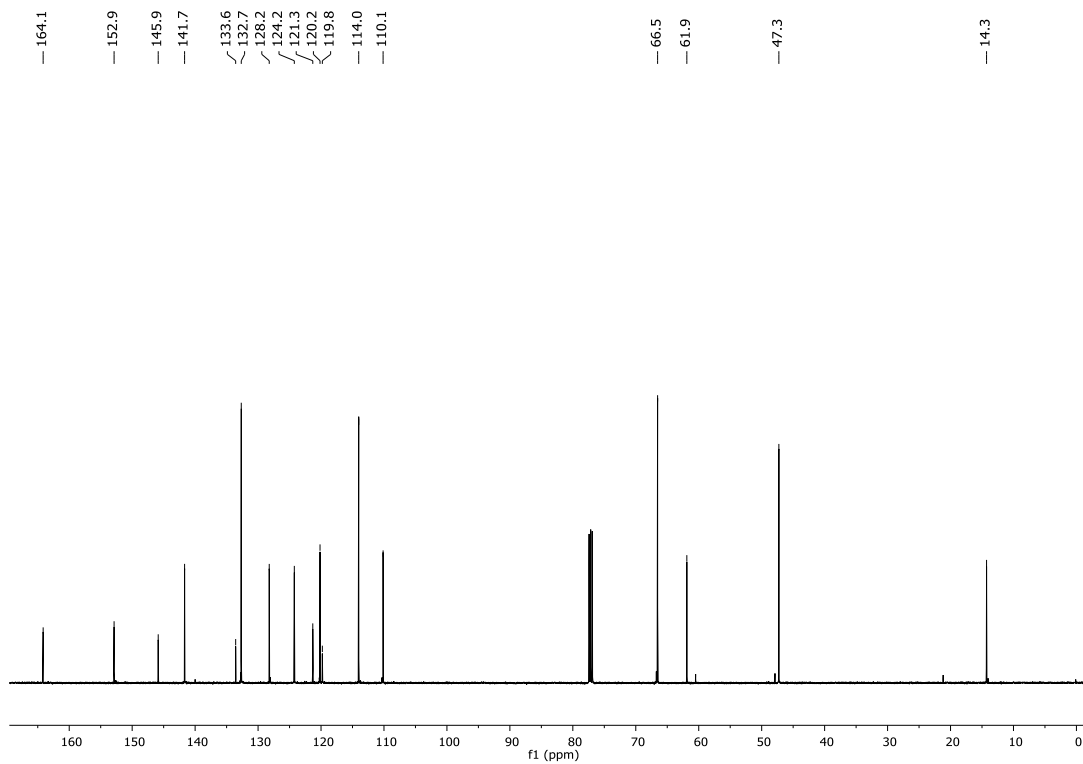

**Fig S18.**  $^{13}\text{C}$  NMR spectrum ( $\text{CDCl}_3$ ) of **7d** derivative

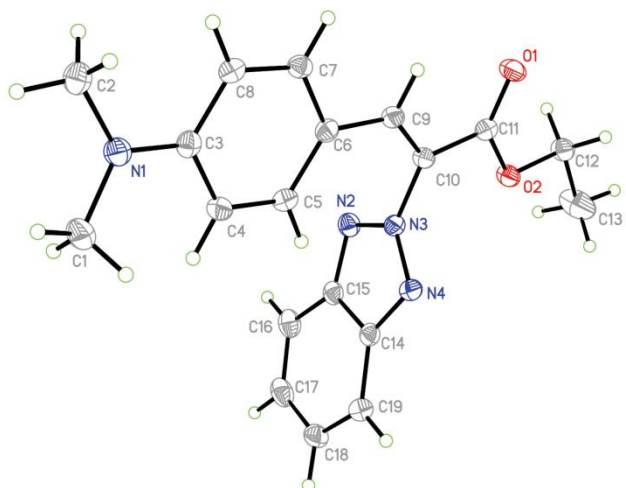

**Fig S19.** Single-crystal X-ray analysis of **6a** derivative (CCDC 1882468)

**Table S1.** Atomic coordinates ( $\times 10^4$ ) and equivalent isotropic displacement parameters ( $\text{\AA}^2 \times 10^3$ ) for **6a** derivative.  $U(\text{eq})$  is defined as one third of the trace of the orthogonalized  $U^{ij}$  tensor.

|       | <b>x</b> | <b>y</b> | <b>z</b> | <b>U(eq)</b> |
|-------|----------|----------|----------|--------------|
| O(1)  | 3490(1)  | -1103(1) | 5189(1)  | 24(1)        |
| C(1)  | 5596(2)  | 8781(2)  | 7024(1)  | 27(1)        |
| N(1)  | 5895(1)  | 8112(1)  | 6469(1)  | 23(1)        |
| C(2)  | 6864(2)  | 9014(2)  | 6132(1)  | 26(1)        |
| N(2)  | 576(1)   | 1913(1)  | 6052(1)  | 20(1)        |
| O(2)  | 1700(1)  | -1578(1) | 5761(1)  | 21(1)        |
| N(3)  | 1886(1)  | 1272(1)  | 6260(1)  | 16(1)        |
| C(3)  | 5417(1)  | 6624(2)  | 6301(1)  | 18(1)        |
| N(4)  | 2179(1)  | 1073(1)  | 6839(1)  | 18(1)        |
| C(4)  | 4364(1)  | 5792(2)  | 6595(1)  | 20(1)        |
| C(7)  | 5456(1)  | 4316(2)  | 5667(1)  | 17(1)        |
| C(6)  | 4408(1)  | 3493(2)  | 5954(1)  | 17(1)        |
| C(5)  | 3872(1)  | 4291(2)  | 6423(1)  | 19(1)        |
| C(9)  | 4001(1)  | 1905(2)  | 5742(1)  | 18(1)        |
| C(8)  | 5933(1)  | 5836(2)  | 5824(1)  | 18(1)        |
| C(10) | 2941(1)  | 881(2)   | 5868(1)  | 17(1)        |
| C(11) | 2762(1)  | -685(2)  | 5568(1)  | 18(1)        |
| C(12) | 1418(2)  | -3093(2) | 5456(1)  | 22(1)        |
| C(13) | 210(2)   | -3917(2) | 5727(1)  | 45(1)        |
| C(14) | 930(1)   | 1655(1)  | 7032(1)  | 18(1)        |
| C(15) | -62(1)   | 2166(1)  | 6544(1)  | 18(1)        |
| C(16) | -1460(2) | 2844(2)  | 6612(1)  | 25(1)        |
| C(17) | -1798(2) | 2988(2)  | 7169(1)  | 27(1)        |
| C(18) | -791(2)  | 2494(2)  | 7663(1)  | 27(1)        |
| C(19) | 563(2)   | 1825(2)  | 7607(1)  | 24(1)        |

**Table S2.** Bond lengths [Å] and angles [°] of **6a** derivative.

---

|              |            |
|--------------|------------|
| O(1)-C(11)   | 1.2074(15) |
| C(1)-N(1)    | 1.4528(16) |
| C(1)-H(1A)   | 0.9800     |
| C(1)-H(1B)   | 0.9800     |
| C(1)-H(1C)   | 0.9800     |
| N(1)-C(3)    | 1.3599(17) |
| N(1)-C(2)    | 1.4513(17) |
| C(2)-H(2A)   | 0.9800     |
| C(2)-H(2B)   | 0.9800     |
| C(2)-H(2C)   | 0.9800     |
| N(2)-N(3)    | 1.3309(14) |
| N(2)-C(15)   | 1.3490(16) |
| O(2)-C(11)   | 1.3358(15) |
| O(2)-C(12)   | 1.4575(15) |
| N(3)-N(4)    | 1.3371(14) |
| N(3)-C(10)   | 1.4304(15) |
| C(3)-C(8)    | 1.4094(17) |
| C(3)-C(4)    | 1.4176(17) |
| N(4)-C(14)   | 1.3535(16) |
| C(4)-C(5)    | 1.3756(18) |
| C(4)-H(4)    | 0.9500     |
| C(7)-C(8)    | 1.3776(18) |
| C(7)-C(6)    | 1.4008(17) |
| C(7)-H(7)    | 0.9500     |
| C(6)-C(5)    | 1.4076(17) |
| C(6)-C(9)    | 1.4485(17) |
| C(5)-H(5)    | 0.9500     |
| C(9)-C(10)   | 1.3426(17) |
| C(9)-H(9)    | 0.9500     |
| C(8)-H(8)    | 0.9500     |
| C(10)-C(11)  | 1.4830(17) |
| C(12)-C(13)  | 1.4909(19) |
| C(12)-H(12A) | 0.9900     |
| C(12)-H(12B) | 0.9900     |

|              |            |
|--------------|------------|
| C(13)-H(13A) | 0.9800     |
| C(13)-H(13B) | 0.9800     |
| C(13)-H(13C) | 0.9800     |
| C(14)-C(19)  | 1.4118(18) |
| C(14)-C(15)  | 1.4131(17) |
| C(15)-C(16)  | 1.4094(18) |
| C(16)-C(17)  | 1.362(2)   |
| C(16)-H(16)  | 0.9500     |
| C(17)-C(18)  | 1.425(2)   |
| C(17)-H(17)  | 0.9500     |
| C(18)-C(19)  | 1.3638(19) |
| C(18)-H(18)  | 0.9500     |
| C(19)-H(19)  | 0.9500     |

|                  |            |
|------------------|------------|
| N(1)-C(1)-H(1A)  | 109.5      |
| N(1)-C(1)-H(1B)  | 109.5      |
| H(1A)-C(1)-H(1B) | 109.5      |
| N(1)-C(1)-H(1C)  | 109.5      |
| H(1A)-C(1)-H(1C) | 109.5      |
| H(1B)-C(1)-H(1C) | 109.5      |
| C(3)-N(1)-C(2)   | 121.03(11) |
| C(3)-N(1)-C(1)   | 121.19(11) |
| C(2)-N(1)-C(1)   | 117.43(11) |
| N(1)-C(2)-H(2A)  | 109.5      |
| N(1)-C(2)-H(2B)  | 109.5      |
| H(2A)-C(2)-H(2B) | 109.5      |
| N(1)-C(2)-H(2C)  | 109.5      |
| H(2A)-C(2)-H(2C) | 109.5      |
| H(2B)-C(2)-H(2C) | 109.5      |
| N(3)-N(2)-C(15)  | 102.40(10) |
| C(11)-O(2)-C(12) | 114.53(9)  |
| N(2)-N(3)-N(4)   | 117.63(10) |
| N(2)-N(3)-C(10)  | 119.78(10) |
| N(4)-N(3)-C(10)  | 122.54(10) |
| N(1)-C(3)-C(8)   | 121.87(11) |
| N(1)-C(3)-C(4)   | 121.44(11) |

|                     |            |
|---------------------|------------|
| C(8)-C(3)-C(4)      | 116.69(11) |
| N(3)-N(4)-C(14)     | 102.44(10) |
| C(5)-C(4)-C(3)      | 121.52(11) |
| C(5)-C(4)-H(4)      | 119.2      |
| C(3)-C(4)-H(4)      | 119.2      |
| C(8)-C(7)-C(6)      | 122.55(11) |
| C(8)-C(7)-H(7)      | 118.7      |
| C(6)-C(7)-H(7)      | 118.7      |
| C(7)-C(6)-C(5)      | 116.46(11) |
| C(7)-C(6)-C(9)      | 116.82(11) |
| C(5)-C(6)-C(9)      | 126.71(11) |
| C(4)-C(5)-C(6)      | 121.75(11) |
| C(4)-C(5)-H(5)      | 119.1      |
| C(6)-C(5)-H(5)      | 119.1      |
| C(10)-C(9)-C(6)     | 132.21(11) |
| C(10)-C(9)-H(9)     | 113.9      |
| C(6)-C(9)-H(9)      | 113.9      |
| C(7)-C(8)-C(3)      | 120.99(11) |
| C(7)-C(8)-H(8)      | 119.5      |
| C(3)-C(8)-H(8)      | 119.5      |
| C(9)-C(10)-N(3)     | 122.53(11) |
| C(9)-C(10)-C(11)    | 120.25(11) |
| N(3)-C(10)-C(11)    | 117.10(10) |
| O(1)-C(11)-O(2)     | 123.86(11) |
| O(1)-C(11)-C(10)    | 123.79(11) |
| O(2)-C(11)-C(10)    | 112.34(10) |
| O(2)-C(12)-C(13)    | 107.07(10) |
| O(2)-C(12)-H(12A)   | 110.3      |
| C(13)-C(12)-H(12A)  | 110.3      |
| O(2)-C(12)-H(12B)   | 110.3      |
| C(13)-C(12)-H(12B)  | 110.3      |
| H(12A)-C(12)-H(12B) | 108.6      |
| C(12)-C(13)-H(13A)  | 109.5      |
| C(12)-C(13)-H(13B)  | 109.5      |
| H(13A)-C(13)-H(13B) | 109.5      |
| C(12)-C(13)-H(13C)  | 109.5      |



|                     |            |
|---------------------|------------|
| H(13A)-C(13)-H(13C) | 109.5      |
| H(13B)-C(13)-H(13C) | 109.5      |
| N(4)-C(14)-C(19)    | 130.40(12) |
| N(4)-C(14)-C(15)    | 108.43(11) |
| C(19)-C(14)-C(15)   | 121.15(11) |
| N(2)-C(15)-C(16)    | 129.68(12) |
| N(2)-C(15)-C(14)    | 109.10(11) |
| C(16)-C(15)-C(14)   | 121.21(12) |
| C(17)-C(16)-C(15)   | 116.77(13) |
| C(17)-C(16)-H(16)   | 121.6      |
| C(15)-C(16)-H(16)   | 121.6      |
| C(16)-C(17)-C(18)   | 122.08(12) |
| C(16)-C(17)-H(17)   | 119.0      |
| C(18)-C(17)-H(17)   | 119.0      |
| C(19)-C(18)-C(17)   | 122.14(13) |
| C(19)-C(18)-H(18)   | 118.9      |
| C(17)-C(18)-H(18)   | 118.9      |
| C(18)-C(19)-C(14)   | 116.64(12) |
| C(18)-C(19)-H(19)   | 121.7      |
| C(14)-C(19)-H(19)   | 121.7      |

---

Symmetry transformations used to generate equivalent atoms:

**Table S3.** Anisotropic displacement parameters ( $\text{\AA}^2 \times 10^3$ ) for **6a** derivative. The anisotropic displacement factor exponent takes the form:  $-2\pi^2 [h^2 a^{*2} U^{11} + \dots + 2 h k a^* b^* U^{12}]$

|       | U <sup>11</sup> | U <sup>22</sup> | U <sup>33</sup> | U <sup>23</sup> | U <sup>13</sup> | U <sup>12</sup> |
|-------|-----------------|-----------------|-----------------|-----------------|-----------------|-----------------|
| O(1)  | 28(1)           | 22(1)           | 24(1)           | -5(1)           | 12(1)           | -4(1)           |
| C(1)  | 32(1)           | 22(1)           | 26(1)           | -6(1)           | 5(1)            | -2(1)           |
| N(1)  | 27(1)           | 20(1)           | 22(1)           | -3(1)           | 4(1)            | -4(1)           |
| C(2)  | 28(1)           | 20(1)           | 29(1)           | -2(1)           | 5(1)            | -5(1)           |
| N(2)  | 19(1)           | 19(1)           | 20(1)           | -1(1)           | 1(1)            | 1(1)            |
| O(2)  | 23(1)           | 17(1)           | 23(1)           | -4(1)           | 8(1)            | -4(1)           |
| N(3)  | 17(1)           | 15(1)           | 17(1)           | 1(1)            | 3(1)            | -1(1)           |
| C(3)  | 18(1)           | 18(1)           | 18(1)           | 1(1)            | -2(1)           | 1(1)            |
| N(4)  | 20(1)           | 19(1)           | 17(1)           | 2(1)            | 4(1)            | 1(1)            |
| C(4)  | 24(1)           | 21(1)           | 16(1)           | -1(1)           | 3(1)            | 1(1)            |
| C(7)  | 17(1)           | 20(1)           | 15(1)           | 0(1)            | 1(1)            | 2(1)            |
| C(6)  | 18(1)           | 18(1)           | 16(1)           | 2(1)            | 1(1)            | 1(1)            |
| C(5)  | 20(1)           | 20(1)           | 17(1)           | 2(1)            | 4(1)            | -1(1)           |
| C(9)  | 19(1)           | 19(1)           | 15(1)           | 1(1)            | 2(1)            | 2(1)            |
| C(8)  | 17(1)           | 21(1)           | 17(1)           | 3(1)            | 2(1)            | -1(1)           |
| C(10) | 18(1)           | 18(1)           | 16(1)           | 0(1)            | 4(1)            | 1(1)            |
| C(11) | 18(1)           | 19(1)           | 17(1)           | 2(1)            | 2(1)            | 0(1)            |
| C(12) | 29(1)           | 18(1)           | 21(1)           | -5(1)           | 4(1)            | -5(1)           |
| C(13) | 50(1)           | 35(1)           | 54(1)           | -19(1)          | 28(1)           | -23(1)          |
| C(14) | 19(1)           | 14(1)           | 21(1)           | 1(1)            | 5(1)            | -1(1)           |
| C(15) | 18(1)           | 14(1)           | 22(1)           | -1(1)           | 3(1)            | -2(1)           |
| C(16) | 20(1)           | 21(1)           | 33(1)           | -2(1)           | 2(1)            | 2(1)            |
| C(17) | 22(1)           | 22(1)           | 40(1)           | -4(1)           | 12(1)           | 2(1)            |
| C(18) | 34(1)           | 23(1)           | 28(1)           | -1(1)           | 16(1)           | 1(1)            |
| C(19) | 30(1)           | 22(1)           | 21(1)           | 2(1)            | 8(1)            | 2(1)            |

**Table S4.** Hydrogen coordinates ( $\times 10^4$ ) and isotropic displacement parameters ( $\text{\AA}^2 \times 10^3$ ) for **6a** derivative.

|        | <b>x</b> | <b>y</b> | <b>z</b> | <b>U(eq)</b> |
|--------|----------|----------|----------|--------------|
| H(1A)  | 6277     | 9676     | 7130     | 40           |
| H(1B)  | 5749     | 7959     | 7328     | 40           |
| H(1C)  | 4561     | 9160     | 6989     | 40           |
| H(2A)  | 6487     | 8939     | 5715     | 38           |
| H(2B)  | 7879     | 8577     | 6200     | 38           |
| H(2C)  | 6879     | 10135    | 6254     | 38           |
| H(4)   | 3990     | 6283     | 6919     | 24           |
| H(7)   | 5852     | 3807     | 5352     | 21           |
| H(5)   | 3152     | 3779     | 6627     | 23           |
| H(9)   | 4596     | 1514     | 5461     | 21           |
| H(8)   | 6620     | 6360     | 5608     | 22           |
| H(12A) | 2336     | -3753    | 5498     | 27           |
| H(12B) | 1101     | -2907    | 5035     | 27           |
| H(13A) | -716     | -3297    | 5653     | 67           |
| H(13B) | 503      | -4011    | 6150     | 67           |
| H(13C) | 49       | -4983    | 5556     | 67           |
| H(16)  | -2134    | 3183     | 6285     | 30           |
| H(17)  | -2735    | 3432     | 7231     | 33           |
| H(18)  | -1071    | 2635     | 8043     | 32           |
| H(19)  | 1225     | 1490     | 7938     | 29           |

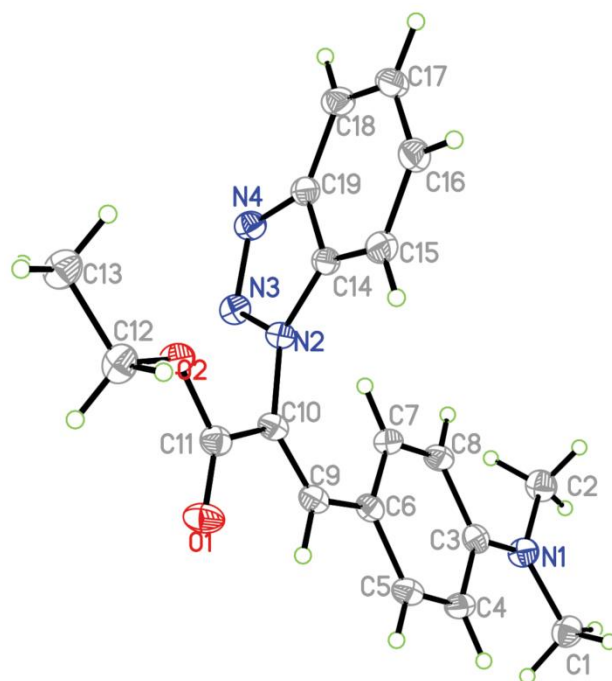

**Fig S20.** Single-crystal X-ray analysis of **7a** derivative (CCDC 1867840)

**Table S5.** Atomic coordinates ( $\times 10^4$ ) and equivalent isotropic displacement parameters ( $\text{\AA}^2 \times 10^3$ ) for **7a** derivative.  $U(\text{eq})$  is defined as one third of the trace of the orthogonalized  $U^{ij}$  tensor.

|       | x        | y        | z       | U(eq) |
|-------|----------|----------|---------|-------|
| O(1)  | 7352(1)  | 847(1)   | 2892(1) | 25(1) |
| N(1)  | 4962(1)  | 9049(1)  | 1703(1) | 22(1) |
| C(1)  | 4209(1)  | 8836(2)  | 1310(1) | 25(1) |
| N(2)  | 8301(1)  | 4700(1)  | 3093(1) | 17(1) |
| O(2)  | 8684(1)  | 1841(1)  | 3338(1) | 22(1) |
| C(2)  | 5328(1)  | 10595(2) | 1804(1) | 26(1) |
| N(3)  | 8053(1)  | 5671(1)  | 3429(1) | 20(1) |
| C(3)  | 5419(1)  | 7813(2)  | 1924(1) | 19(1) |
| N(4)  | 8833(1)  | 6537(1)  | 3558(1) | 21(1) |
| C(4)  | 5103(1)  | 6301(2)  | 1814(1) | 20(1) |
| C(5)  | 5562(1)  | 5070(2)  | 2042(1) | 20(1) |
| C(6)  | 6372(1)  | 5236(2)  | 2389(1) | 18(1) |
| C(7)  | 6685(1)  | 6745(2)  | 2499(1) | 20(1) |
| C(8)  | 6224(1)  | 7994(2)  | 2278(1) | 20(1) |
| C(9)  | 6799(1)  | 3847(2)  | 2597(1) | 19(1) |
| C(10) | 7616(1)  | 3552(1)  | 2898(1) | 18(1) |
| C(11) | 7850(1)  | 1945(2)  | 3036(1) | 19(1) |
| N(11) | 10255(1) | 3311(1)  | 4665(1) | 22(1) |
| O(11) | 4304(1)  | 3349(1)  | 5425(1) | 27(1) |
| C(12) | 9001(1)  | 287(2)   | 3467(1) | 24(1) |
| N(12) | 6498(1)  | 1179(1)  | 5896(1) | 18(1) |
| O(12) | 4546(1)  | 1524(1)  | 5970(1) | 22(1) |
| C(14) | 9286(1)  | 4936(1)  | 3015(1) | 18(1) |
| N(14) | 7606(1)  | 567(1)   | 6467(1) | 24(1) |
| C(13) | 9779(1)  | 396(2)   | 3874(1) | 27(1) |
| N(13) | 7144(1)  | 1723(1)  | 6258(1) | 22(1) |
| C(15) | 9920(1)  | 4203(2)  | 2732(1) | 22(1) |
| C(18) | 10626(1) | 6644(2)  | 3337(1) | 23(1) |
| C(17) | 11253(1) | 5932(2)  | 3063(1) | 25(1) |
| C(16) | 10904(1) | 4726(2)  | 2765(1) | 24(1) |
| C(19) | 9618(1)  | 6122(1)  | 3312(1) | 19(1) |

|       |          |          |         |       |
|-------|----------|----------|---------|-------|
| C(21) | 10425(1) | 4291(2)  | 4280(1) | 27(1) |
| C(22) | 11101(1) | 2403(2)  | 4875(1) | 25(1) |
| C(23) | 9309(1)  | 3155(1)  | 4795(1) | 19(1) |
| C(24) | 8479(1)  | 4023(2)  | 4592(1) | 21(1) |
| C(25) | 7550(1)  | 3927(2)  | 4754(1) | 21(1) |
| C(26) | 7361(1)  | 2951(1)  | 5116(1) | 19(1) |
| C(27) | 8179(1)  | 2027(2)  | 5301(1) | 20(1) |
| C(28) | 9115(1)  | 2119(2)  | 5145(1) | 21(1) |
| C(29) | 6354(1)  | 2970(1)  | 5258(1) | 20(1) |
| C(30) | 5936(1)  | 2213(1)  | 5590(1) | 19(1) |
| C(31) | 4852(1)  | 2447(2)  | 5648(1) | 20(1) |
| C(32) | 3462(1)  | 1508(2)  | 6015(1) | 26(1) |
| C(33) | 2940(1)  | 385(2)   | 5677(1) | 34(1) |
| C(34) | 6556(1)  | -382(2)  | 5880(1) | 18(1) |
| C(35) | 6074(1)  | -1486(2) | 5586(1) | 22(1) |
| C(36) | 6336(1)  | -2991(2) | 5684(1) | 27(1) |
| C(37) | 7043(1)  | -3395(2) | 6058(1) | 28(1) |
| C(38) | 7519(1)  | -2305(2) | 6342(1) | 26(1) |
| C(39) | 7267(1)  | -767(2)  | 6247(1) | 21(1) |

---

**Table S6.** Bond lengths [Å] and angles [°] for **7a** derivative.

---

|             |            |
|-------------|------------|
| O(1)-C(11)  | 1.2106(16) |
| N(1)-C(3)   | 1.3644(17) |
| N(1)-C(2)   | 1.4512(17) |
| N(1)-C(1)   | 1.4523(17) |
| C(1)-H(1A)  | 0.9600     |
| C(1)-H(1B)  | 0.9600     |
| C(1)-H(1C)  | 0.9600     |
| N(2)-C(14)  | 1.3654(16) |
| N(2)-N(3)   | 1.3692(15) |
| N(2)-C(10)  | 1.4260(16) |
| O(2)-C(11)  | 1.3408(15) |
| O(2)-C(12)  | 1.4544(15) |
| C(2)-H(2A)  | 0.9600     |
| C(2)-H(2B)  | 0.9600     |
| C(2)-H(2C)  | 0.9600     |
| N(3)-N(4)   | 1.3017(15) |
| C(3)-C(4)   | 1.4089(18) |
| C(3)-C(8)   | 1.4132(18) |
| N(4)-C(19)  | 1.3806(17) |
| C(4)-C(5)   | 1.3712(19) |
| C(4)-H(4)   | 0.9300     |
| C(5)-C(6)   | 1.4025(18) |
| C(5)-H(5)   | 0.9300     |
| C(6)-C(7)   | 1.4050(18) |
| C(6)-C(9)   | 1.4421(18) |
| C(7)-C(8)   | 1.3745(18) |
| C(7)-H(7)   | 0.9300     |
| C(8)-H(8)   | 0.9300     |
| C(9)-C(10)  | 1.3446(18) |
| C(9)-H(9)   | 0.9300     |
| C(10)-C(11) | 1.4794(18) |
| N(11)-C(23) | 1.3573(17) |
| N(11)-C(22) | 1.4519(17) |
| N(11)-C(21) | 1.4552(17) |

|              |            |
|--------------|------------|
| O(11)-C(31)  | 1.2111(16) |
| C(12)-C(13)  | 1.4934(19) |
| C(12)-H(12A) | 0.9700     |
| C(12)-H(12B) | 0.9700     |
| N(12)-C(34)  | 1.3624(17) |
| N(12)-N(13)  | 1.3724(15) |
| N(12)-C(30)  | 1.4235(16) |
| O(12)-C(31)  | 1.3415(16) |
| O(12)-C(32)  | 1.4553(16) |
| C(14)-C(19)  | 1.3915(18) |
| C(14)-C(15)  | 1.4001(18) |
| N(14)-N(13)  | 1.2980(16) |
| N(14)-C(39)  | 1.3801(18) |
| C(13)-H(13A) | 0.9600     |
| C(13)-H(13B) | 0.9600     |
| C(13)-H(13C) | 0.9600     |
| C(15)-C(16)  | 1.3731(19) |
| C(15)-H(15)  | 0.9300     |
| C(18)-C(17)  | 1.370(2)   |
| C(18)-C(19)  | 1.4035(19) |
| C(18)-H(18)  | 0.9300     |
| C(17)-C(16)  | 1.412(2)   |
| C(17)-H(17)  | 0.9300     |
| C(16)-H(16)  | 0.9300     |
| C(21)-H(21A) | 0.9600     |
| C(21)-H(21B) | 0.9600     |
| C(21)-H(21C) | 0.9600     |
| C(22)-H(22A) | 0.9600     |
| C(22)-H(22B) | 0.9600     |
| C(22)-H(22C) | 0.9600     |
| C(23)-C(24)  | 1.4112(18) |
| C(23)-C(28)  | 1.4143(18) |
| C(24)-C(25)  | 1.3704(19) |
| C(24)-H(24)  | 0.9300     |
| C(25)-C(26)  | 1.4079(19) |
| C(25)-H(25)  | 0.9300     |



|                  |            |
|------------------|------------|
| C(26)-C(27)      | 1.4082(18) |
| C(26)-C(29)      | 1.4421(18) |
| C(27)-C(28)      | 1.3707(19) |
| C(27)-H(27)      | 0.9300     |
| C(28)-H(28)      | 0.9300     |
| C(29)-C(30)      | 1.3490(19) |
| C(29)-H(29)      | 0.9300     |
| C(30)-C(31)      | 1.4779(18) |
| C(32)-C(33)      | 1.506(2)   |
| C(32)-H(32A)     | 0.9700     |
| C(32)-H(32B)     | 0.9700     |
| C(33)-H(33A)     | 0.9600     |
| C(33)-H(33B)     | 0.9600     |
| C(33)-H(33C)     | 0.9600     |
| C(34)-C(39)      | 1.3920(18) |
| C(34)-C(35)      | 1.3985(19) |
| C(35)-C(36)      | 1.378(2)   |
| C(35)-H(35)      | 0.9300     |
| C(36)-C(37)      | 1.407(2)   |
| C(36)-H(36)      | 0.9300     |
| C(37)-C(38)      | 1.370(2)   |
| C(37)-H(37)      | 0.9300     |
| C(38)-C(39)      | 1.4012(19) |
| C(38)-H(38)      | 0.9300     |
|                  |            |
| C(3)-N(1)-C(2)   | 120.89(11) |
| C(3)-N(1)-C(1)   | 120.57(11) |
| C(2)-N(1)-C(1)   | 117.79(11) |
| N(1)-C(1)-H(1A)  | 109.5      |
| N(1)-C(1)-H(1B)  | 109.5      |
| H(1A)-C(1)-H(1B) | 109.5      |
| N(1)-C(1)-H(1C)  | 109.5      |
| H(1A)-C(1)-H(1C) | 109.5      |
| H(1B)-C(1)-H(1C) | 109.5      |
| C(14)-N(2)-N(3)  | 109.82(10) |
| C(14)-N(2)-C(10) | 127.99(11) |

|                  |            |
|------------------|------------|
| N(3)-N(2)-C(10)  | 121.96(10) |
| C(11)-O(2)-C(12) | 115.36(10) |
| N(1)-C(2)-H(2A)  | 109.5      |
| N(1)-C(2)-H(2B)  | 109.5      |
| H(2A)-C(2)-H(2B) | 109.5      |
| N(1)-C(2)-H(2C)  | 109.5      |
| H(2A)-C(2)-H(2C) | 109.5      |
| H(2B)-C(2)-H(2C) | 109.5      |
| N(4)-N(3)-N(2)   | 108.80(10) |
| N(1)-C(3)-C(4)   | 121.48(12) |
| N(1)-C(3)-C(8)   | 121.45(12) |
| C(4)-C(3)-C(8)   | 117.07(12) |
| N(3)-N(4)-C(19)  | 108.32(10) |
| C(5)-C(4)-C(3)   | 120.84(12) |
| C(5)-C(4)-H(4)   | 119.6      |
| C(3)-C(4)-H(4)   | 119.6      |
| C(4)-C(5)-C(6)   | 122.57(12) |
| C(4)-C(5)-H(5)   | 118.7      |
| C(6)-C(5)-H(5)   | 118.7      |
| C(5)-C(6)-C(7)   | 116.42(12) |
| C(5)-C(6)-C(9)   | 117.05(11) |
| C(7)-C(6)-C(9)   | 126.52(12) |
| C(8)-C(7)-C(6)   | 121.86(12) |
| C(8)-C(7)-H(7)   | 119.1      |
| C(6)-C(7)-H(7)   | 119.1      |
| C(7)-C(8)-C(3)   | 121.22(12) |
| C(7)-C(8)-H(8)   | 119.4      |
| C(3)-C(8)-H(8)   | 119.4      |
| C(10)-C(9)-C(6)  | 133.55(12) |
| C(10)-C(9)-H(9)  | 113.2      |
| C(6)-C(9)-H(9)   | 113.2      |
| C(9)-C(10)-N(2)  | 123.99(11) |
| C(9)-C(10)-C(11) | 119.31(11) |
| N(2)-C(10)-C(11) | 116.69(11) |
| O(1)-C(11)-O(2)  | 123.63(12) |
| O(1)-C(11)-C(10) | 124.23(12) |

|                     |            |
|---------------------|------------|
| O(2)-C(11)-C(10)    | 112.14(11) |
| C(23)-N(11)-C(22)   | 121.20(11) |
| C(23)-N(11)-C(21)   | 120.39(11) |
| C(22)-N(11)-C(21)   | 118.16(11) |
| O(2)-C(12)-C(13)    | 107.68(11) |
| O(2)-C(12)-H(12A)   | 110.2      |
| C(13)-C(12)-H(12A)  | 110.2      |
| O(2)-C(12)-H(12B)   | 110.2      |
| C(13)-C(12)-H(12B)  | 110.2      |
| H(12A)-C(12)-H(12B) | 108.5      |
| C(34)-N(12)-N(13)   | 109.81(10) |
| C(34)-N(12)-C(30)   | 129.52(11) |
| N(13)-N(12)-C(30)   | 120.55(10) |
| C(31)-O(12)-C(32)   | 116.65(10) |
| N(2)-C(14)-C(19)    | 104.32(11) |
| N(2)-C(14)-C(15)    | 132.69(12) |
| C(19)-C(14)-C(15)   | 122.93(12) |
| N(13)-N(14)-C(39)   | 108.55(10) |
| C(12)-C(13)-H(13A)  | 109.5      |
| C(12)-C(13)-H(13B)  | 109.5      |
| H(13A)-C(13)-H(13B) | 109.5      |
| C(12)-C(13)-H(13C)  | 109.5      |
| H(13A)-C(13)-H(13C) | 109.5      |
| H(13B)-C(13)-H(13C) | 109.5      |
| N(14)-N(13)-N(12)   | 108.68(10) |
| C(16)-C(15)-C(14)   | 115.66(12) |
| C(16)-C(15)-H(15)   | 122.2      |
| C(14)-C(15)-H(15)   | 122.2      |
| C(17)-C(18)-C(19)   | 117.22(12) |
| C(17)-C(18)-H(18)   | 121.4      |
| C(19)-C(18)-H(18)   | 121.4      |
| C(18)-C(17)-C(16)   | 121.58(13) |
| C(18)-C(17)-H(17)   | 119.2      |
| C(16)-C(17)-H(17)   | 119.2      |
| C(15)-C(16)-C(17)   | 122.24(13) |
| C(15)-C(16)-H(16)   | 118.9      |

|                     |            |
|---------------------|------------|
| C(17)-C(16)-H(16)   | 118.9      |
| N(4)-C(19)-C(14)    | 108.71(11) |
| N(4)-C(19)-C(18)    | 130.85(12) |
| C(14)-C(19)-C(18)   | 120.36(12) |
| N(11)-C(21)-H(21A)  | 109.5      |
| N(11)-C(21)-H(21B)  | 109.5      |
| H(21A)-C(21)-H(21B) | 109.5      |
| N(11)-C(21)-H(21C)  | 109.5      |
| H(21A)-C(21)-H(21C) | 109.5      |
| H(21B)-C(21)-H(21C) | 109.5      |
| N(11)-C(22)-H(22A)  | 109.5      |
| N(11)-C(22)-H(22B)  | 109.5      |
| H(22A)-C(22)-H(22B) | 109.5      |
| N(11)-C(22)-H(22C)  | 109.5      |
| H(22A)-C(22)-H(22C) | 109.5      |
| H(22B)-C(22)-H(22C) | 109.5      |
| N(11)-C(23)-C(24)   | 121.78(12) |
| N(11)-C(23)-C(28)   | 121.24(12) |
| C(24)-C(23)-C(28)   | 116.98(12) |
| C(25)-C(24)-C(23)   | 120.43(12) |
| C(25)-C(24)-H(24)   | 119.8      |
| C(23)-C(24)-H(24)   | 119.8      |
| C(24)-C(25)-C(26)   | 122.89(12) |
| C(24)-C(25)-H(25)   | 118.6      |
| C(26)-C(25)-H(25)   | 118.6      |
| C(25)-C(26)-C(27)   | 116.31(12) |
| C(25)-C(26)-C(29)   | 117.41(11) |
| C(27)-C(26)-C(29)   | 126.27(12) |
| C(28)-C(27)-C(26)   | 121.48(12) |
| C(28)-C(27)-H(27)   | 119.3      |
| C(26)-C(27)-H(27)   | 119.3      |
| C(27)-C(28)-C(23)   | 121.75(12) |
| C(27)-C(28)-H(28)   | 119.1      |
| C(23)-C(28)-H(28)   | 119.1      |
| C(30)-C(29)-C(26)   | 132.20(12) |
| C(30)-C(29)-H(29)   | 113.9      |

|                     |            |
|---------------------|------------|
| C(26)-C(29)-H(29)   | 113.9      |
| C(29)-C(30)-N(12)   | 122.74(12) |
| C(29)-C(30)-C(31)   | 119.83(12) |
| N(12)-C(30)-C(31)   | 117.43(11) |
| O(11)-C(31)-O(12)   | 124.16(12) |
| O(11)-C(31)-C(30)   | 123.96(12) |
| O(12)-C(31)-C(30)   | 111.87(11) |
| O(12)-C(32)-C(33)   | 109.36(11) |
| O(12)-C(32)-H(32A)  | 109.8      |
| C(33)-C(32)-H(32A)  | 109.8      |
| O(12)-C(32)-H(32B)  | 109.8      |
| C(33)-C(32)-H(32B)  | 109.8      |
| H(32A)-C(32)-H(32B) | 108.3      |
| C(32)-C(33)-H(33A)  | 109.5      |
| C(32)-C(33)-H(33B)  | 109.5      |
| H(33A)-C(33)-H(33B) | 109.5      |
| C(32)-C(33)-H(33C)  | 109.5      |
| H(33A)-C(33)-H(33C) | 109.5      |
| H(33B)-C(33)-H(33C) | 109.5      |
| N(12)-C(34)-C(39)   | 104.41(11) |
| N(12)-C(34)-C(35)   | 133.16(12) |
| C(39)-C(34)-C(35)   | 122.43(12) |
| C(36)-C(35)-C(34)   | 115.99(13) |
| C(36)-C(35)-H(35)   | 122.0      |
| C(34)-C(35)-H(35)   | 122.0      |
| C(35)-C(36)-C(37)   | 122.06(14) |
| C(35)-C(36)-H(36)   | 119.0      |
| C(37)-C(36)-H(36)   | 119.0      |
| C(38)-C(37)-C(36)   | 121.59(13) |
| C(38)-C(37)-H(37)   | 119.2      |
| C(36)-C(37)-H(37)   | 119.2      |
| C(37)-C(38)-C(39)   | 117.25(13) |
| C(37)-C(38)-H(38)   | 121.4      |
| C(39)-C(38)-H(38)   | 121.4      |
| N(14)-C(39)-C(34)   | 108.55(11) |
| N(14)-C(39)-C(38)   | 130.79(12) |

---

Symmetry transformations used to generate equivalent atoms:

**Table S7.** Anisotropic displacement parameters ( $\text{\AA}^2 \times 10^3$ ) for **7a** derivative. The anisotropic displacement factor exponent takes the form:  $-2\pi^2 [h^2 a^{*2} U^{11} + \dots + 2 h k a^* b^* U^{12}]$ .

|       | U <sup>11</sup> | U <sup>22</sup> | U <sup>33</sup> | U <sup>23</sup> | U <sup>13</sup> | U <sup>12</sup> |
|-------|-----------------|-----------------|-----------------|-----------------|-----------------|-----------------|
| O(1)  | 22(1)           | 17(1)           | 34(1)           | -3(1)           | -1(1)           | -3(1)           |
| N(1)  | 23(1)           | 18(1)           | 24(1)           | 2(1)            | -1(1)           | 1(1)            |
| C(1)  | 24(1)           | 26(1)           | 24(1)           | 3(1)            | -1(1)           | 4(1)            |
| N(2)  | 15(1)           | 17(1)           | 19(1)           | -1(1)           | 1(1)            | -1(1)           |
| O(2)  | 22(1)           | 16(1)           | 26(1)           | 2(1)            | -4(1)           | 0(1)            |
| C(2)  | 28(1)           | 20(1)           | 29(1)           | 3(1)            | 2(1)            | 1(1)            |
| N(3)  | 21(1)           | 16(1)           | 21(1)           | -1(1)           | 1(1)            | 2(1)            |
| C(3)  | 16(1)           | 20(1)           | 21(1)           | 0(1)            | 6(1)            | 2(1)            |
| N(4)  | 22(1)           | 16(1)           | 23(1)           | 0(1)            | -1(1)           | -1(1)           |
| C(4)  | 17(1)           | 23(1)           | 21(1)           | -3(1)           | 0(1)            | -1(1)           |
| C(5)  | 18(1)           | 18(1)           | 25(1)           | -3(1)           | 3(1)            | -2(1)           |
| C(6)  | 16(1)           | 19(1)           | 21(1)           | 0(1)            | 4(1)            | -1(1)           |
| C(7)  | 17(1)           | 23(1)           | 19(1)           | -1(1)           | 0(1)            | -2(1)           |
| C(8)  | 20(1)           | 17(1)           | 23(1)           | -2(1)           | 2(1)            | -3(1)           |
| C(9)  | 17(1)           | 18(1)           | 22(1)           | -2(1)           | 5(1)            | -2(1)           |
| C(10) | 17(1)           | 17(1)           | 21(1)           | -2(1)           | 4(1)            | -2(1)           |
| C(11) | 16(1)           | 20(1)           | 21(1)           | -2(1)           | 4(1)            | 1(1)            |
| N(11) | 21(1)           | 21(1)           | 24(1)           | 4(1)            | 5(1)            | 2(1)            |
| O(11) | 21(1)           | 28(1)           | 32(1)           | 3(1)            | 3(1)            | 7(1)            |
| C(12) | 32(1)           | 15(1)           | 25(1)           | 2(1)            | 0(1)            | 4(1)            |
| N(12) | 16(1)           | 19(1)           | 20(1)           | -2(1)           | 0(1)            | -1(1)           |
| O(12) | 16(1)           | 25(1)           | 26(1)           | 0(1)            | 3(1)            | 1(1)            |
| C(14) | 17(1)           | 16(1)           | 19(1)           | 4(1)            | 0(1)            | -1(1)           |
| N(14) | 18(1)           | 30(1)           | 22(1)           | 2(1)            | 1(1)            | -1(1)           |
| C(13) | 31(1)           | 22(1)           | 27(1)           | 1(1)            | -2(1)           | 4(1)            |
| N(13) | 18(1)           | 27(1)           | 22(1)           | -2(1)           | 0(1)            | -3(1)           |

|       |       |       |       |       |       |       |
|-------|-------|-------|-------|-------|-------|-------|
| C(15) | 22(1) | 22(1) | 21(1) | 0(1)  | 1(1)  | -1(1) |
| C(18) | 24(1) | 19(1) | 26(1) | 2(1)  | -3(1) | -5(1) |
| C(17) | 17(1) | 28(1) | 28(1) | 8(1)  | -1(1) | -4(1) |
| C(16) | 20(1) | 30(1) | 23(1) | 4(1)  | 4(1)  | 0(1)  |
| C(19) | 20(1) | 16(1) | 20(1) | 3(1)  | -1(1) | -1(1) |
| C(21) | 28(1) | 25(1) | 29(1) | 5(1)  | 10(1) | 2(1)  |
| C(22) | 21(1) | 23(1) | 32(1) | 3(1)  | 4(1)  | 2(1)  |
| C(23) | 21(1) | 17(1) | 19(1) | -4(1) | 2(1)  | 0(1)  |
| C(24) | 25(1) | 19(1) | 20(1) | 2(1)  | 2(1)  | 1(1)  |
| C(25) | 21(1) | 19(1) | 22(1) | -1(1) | -2(1) | 3(1)  |
| C(26) | 21(1) | 16(1) | 20(1) | -2(1) | 0(1)  | 1(1)  |
| C(27) | 22(1) | 18(1) | 21(1) | 2(1)  | 2(1)  | 1(1)  |
| C(28) | 21(1) | 18(1) | 22(1) | 1(1)  | 0(1)  | 3(1)  |
| C(29) | 20(1) | 16(1) | 23(1) | -3(1) | -2(1) | 2(1)  |
| C(30) | 18(1) | 16(1) | 23(1) | -4(1) | 0(1)  | 1(1)  |
| C(31) | 21(1) | 18(1) | 21(1) | -5(1) | 2(1)  | 0(1)  |
| C(32) | 17(1) | 29(1) | 32(1) | -1(1) | 6(1)  | 1(1)  |
| C(33) | 24(1) | 40(1) | 39(1) | 1(1)  | -1(1) | -7(1) |
| C(34) | 15(1) | 19(1) | 21(1) | 1(1)  | 6(1)  | 1(1)  |
| C(35) | 21(1) | 23(1) | 24(1) | -2(1) | 3(1)  | 0(1)  |
| C(36) | 28(1) | 22(1) | 33(1) | -4(1) | 10(1) | -1(1) |
| C(37) | 28(1) | 22(1) | 36(1) | 7(1)  | 14(1) | 5(1)  |
| C(38) | 20(1) | 31(1) | 28(1) | 10(1) | 8(1)  | 6(1)  |
| C(39) | 15(1) | 27(1) | 22(1) | 3(1)  | 6(1)  | 0(1)  |

---

**Table S8.** Hydrogen coordinates ( $\times 10^4$ ) and isotropic displacement parameters ( $\text{\AA}^2 \times 10^3$ ) for **7a** derivative.

|        | x     | y     | z    | U(eq) |
|--------|-------|-------|------|-------|
| H(1A)  | 3962  | 9819  | 1199 | 37    |
| H(1B)  | 3654  | 8238  | 1397 | 37    |
| H(1C)  | 4514  | 8311  | 1073 | 37    |
| H(2A)  | 5980  | 10725 | 1696 | 38    |
| H(2B)  | 5389  | 10761 | 2129 | 38    |
| H(2C)  | 4857  | 11323 | 1655 | 38    |
| H(4)   | 4575  | 6135  | 1583 | 24    |
| H(5)   | 5328  | 4088  | 1964 | 24    |
| H(7)   | 7219  | 6904  | 2727 | 24    |
| H(8)   | 6446  | 8977  | 2363 | 24    |
| H(9)   | 6432  | 2971  | 2504 | 23    |
| H(12A) | 9288  | -213  | 3216 | 29    |
| H(12B) | 8423  | -310  | 3541 | 29    |
| H(13A) | 10004 | -617  | 3966 | 40    |
| H(13B) | 9487  | 887   | 4120 | 40    |
| H(13C) | 10348 | 986   | 3796 | 40    |
| H(15)  | 9689  | 3412  | 2535 | 26    |
| H(18)  | 10858 | 7440  | 3532 | 28    |
| H(17)  | 11925 | 6252  | 3072 | 30    |
| H(16)  | 11355 | 4270  | 2586 | 29    |
| H(21A) | 10097 | 3850  | 4003 | 40    |
| H(21B) | 11141 | 4376  | 4260 | 40    |
| H(21C) | 10147 | 5291  | 4324 | 40    |
| H(22A) | 10985 | 1339  | 4801 | 38    |
| H(22B) | 11161 | 2534  | 5201 | 38    |
| H(22C) | 11718 | 2735  | 4762 | 38    |
| H(24)  | 8562  | 4665  | 4346 | 25    |
| H(25)  | 7022  | 4534  | 4619 | 25    |
| H(27)  | 8082  | 1339  | 5534 | 24    |
| H(28)  | 9635  | 1483  | 5273 | 25    |
| H(29)  | 5907  | 3629  | 5087 | 24    |



|        |      |       |      |    |
|--------|------|-------|------|----|
| H(32A) | 3180 | 2527  | 5957 | 31 |
| H(32B) | 3352 | 1212  | 6323 | 31 |
| H(33A) | 3030 | 705   | 5372 | 52 |
| H(33B) | 2228 | 352   | 5712 | 52 |
| H(33C) | 3230 | -617  | 5732 | 52 |
| H(35)  | 5605 | -1221 | 5340 | 27 |
| H(36)  | 6035 | -3765 | 5497 | 33 |
| H(37)  | 7191 | -4427 | 6114 | 34 |
| H(38)  | 7991 | -2575 | 6587 | 31 |

---

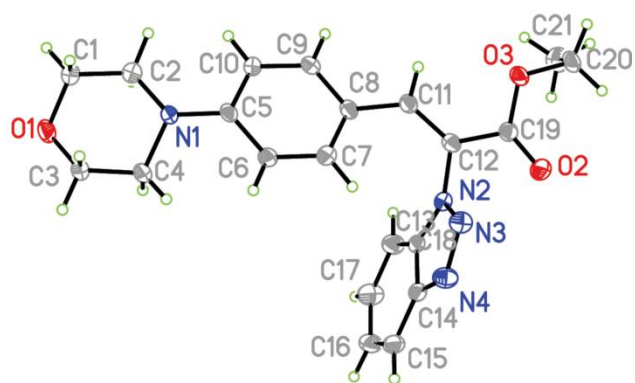

**Fig S21.** Single-crystal X-ray analysis of **7d** derivative (CCDC 1882467)

**Table S9.** Atomic coordinates ( $\times 10^4$ ) and equivalent isotropic displacement parameters ( $\text{\AA}^2 \times 10^3$ ) for **7d** derivative.  $U(\text{eq})$  is defined as one third of the trace of the orthogonalized  $U^{\text{ij}}$  tensor.

|       | x        | y        | z       | U(eq) |
|-------|----------|----------|---------|-------|
| O(1)  | 6630(1)  | 3687(3)  | 4694(1) | 27(1) |
| N(1)  | 8199(1)  | 2770(4)  | 4565(1) | 20(1) |
| C(1)  | 7197(2)  | 4574(5)  | 4942(1) | 27(1) |
| O(2)  | 12526(1) | 988(3)   | 3160(1) | 30(1) |
| N(2)  | 11113(1) | -197(4)  | 3418(1) | 18(1) |
| C(2)  | 7949(2)  | 4803(5)  | 4728(1) | 27(1) |
| C(3)  | 6863(2)  | 1628(5)  | 4579(1) | 28(1) |
| O(3)  | 12719(1) | 3008(3)  | 3702(1) | 24(1) |
| N(3)  | 11162(1) | -2267(4) | 3532(1) | 23(1) |
| C(4)  | 7593(2)  | 1691(5)  | 4344(1) | 28(1) |
| N(4)  | 10707(1) | -3390(4) | 3312(1) | 26(1) |
| C(5)  | 8930(1)  | 2706(4)  | 4400(1) | 19(1) |
| C(6)  | 9178(2)  | 959(5)   | 4179(1) | 21(1) |
| C(7)  | 9902(2)  | 867(5)   | 4017(1) | 22(1) |
| C(8)  | 10417(2) | 2516(5)  | 4065(1) | 20(1) |
| C(9)  | 10181(2) | 4228(5)  | 4293(1) | 24(1) |
| C(10) | 9456(2)  | 4346(5)  | 4457(1) | 23(1) |
| C(11) | 11189(2) | 2617(4)  | 3900(1) | 19(1) |
| O(11) | 5750(1)  | 1086(4)  | 5341(1) | 28(1) |
| N(11) | 4194(1)  | 2174(4)  | 5468(1) | 22(1) |
| C(12) | 11518(1) | 1414(4)  | 3621(1) | 20(1) |
| O(12) | -113(1)  | 4629(4)  | 6857(1) | 34(1) |
| N(12) | 1314(1)  | 5631(4)  | 6603(1) | 19(1) |
| C(14) | 10354(2) | -2048(4) | 3045(1) | 19(1) |
| N(14) | 1531(2)  | 8863(4)  | 6788(1) | 28(1) |
| C(13) | 10612(1) | 1(4)     | 3110(1) | 17(1) |
| O(13) | -299(1)  | 2362(4)  | 6348(1) | 34(1) |
| N(13) | 1127(1)  | 7714(4)  | 6547(1) | 25(1) |
| C(16) | 9570(2)  | -778(5)  | 2529(1) | 29(1) |
| C(15) | 9822(2)  | -2468(5) | 2745(1) | 25(1) |
| C(18) | 10366(2) | 1742(5)  | 2890(1) | 27(1) |

|       |          |         |         |       |
|-------|----------|---------|---------|-------|
| C(17) | 9840(2)  | 1293(5) | 2599(1) | 32(1) |
| C(19) | 12300(2) | 1766(4) | 3466(1) | 21(1) |
| C(20) | 13477(2) | 3578(5) | 3557(1) | 26(1) |
| C(21) | 13440(2) | 5552(5) | 3309(1) | 35(1) |
| C(31) | 5171(2)  | 249(5)  | 5094(1) | 30(1) |
| C(32) | 4421(2)  | 96(5)   | 5310(1) | 28(1) |
| C(33) | 5545(2)  | 3165(5) | 5454(1) | 30(1) |
| C(34) | 4815(2)  | 3182(5) | 5692(1) | 29(1) |
| C(35) | 3464(2)  | 2319(4) | 5634(1) | 21(1) |
| C(36) | 3234(2)  | 4163(5) | 5838(1) | 22(1) |
| C(37) | 2518(2)  | 4340(4) | 6004(1) | 21(1) |
| C(38) | 1984(2)  | 2686(4) | 5975(1) | 19(1) |
| C(39) | 2206(2)  | 893(5)  | 5763(1) | 24(1) |
| C(40) | 2924(2)  | 699(5)  | 5596(1) | 24(1) |
| C(41) | 1219(2)  | 2691(4) | 6145(1) | 20(1) |
| C(42) | 900(2)   | 3997(4) | 6411(1) | 20(1) |
| C(43) | 1848(2)  | 5457(4) | 6896(1) | 20(1) |
| C(44) | 1985(2)  | 7524(4) | 7014(1) | 22(1) |
| C(45) | 2506(2)  | 7974(5) | 7319(1) | 30(1) |
| C(46) | 2888(2)  | 6294(6) | 7477(1) | 32(1) |
| C(47) | 2759(2)  | 4203(5) | 7348(1) | 32(1) |
| C(48) | 2231(2)  | 3735(5) | 7058(1) | 26(1) |
| C(49) | 114(2)   | 3713(5) | 6569(1) | 24(1) |
| C(50) | -1048(2) | 1747(6) | 6494(1) | 42(1) |
| C(51) | -1009(2) | -225(6) | 6718(1) | 51(1) |

---

**Table S10.** Bond lengths [ $\text{\AA}$ ] and angles [ $^\circ$ ] for **7d** derivative.

---

|             |          |
|-------------|----------|
| O(1)-C(1)   | 1.416(4) |
| O(1)-C(3)   | 1.419(4) |
| N(1)-C(5)   | 1.400(3) |
| N(1)-C(2)   | 1.465(4) |
| N(1)-C(4)   | 1.468(3) |
| C(1)-C(2)   | 1.513(4) |
| C(1)-H(1A)  | 0.9900   |
| C(1)-H(1AB) | 0.9900   |
| O(2)-C(19)  | 1.209(3) |
| N(2)-C(13)  | 1.365(3) |
| N(2)-N(3)   | 1.368(3) |
| N(2)-C(12)  | 1.420(3) |
| C(2)-H(2A)  | 0.9900   |
| C(2)-H(2AB) | 0.9900   |
| C(3)-C(4)   | 1.508(4) |
| C(3)-H(3A)  | 0.9900   |
| C(3)-H(3AB) | 0.9900   |
| O(3)-C(19)  | 1.339(3) |
| O(3)-C(20)  | 1.463(3) |
| N(3)-N(4)   | 1.302(3) |
| C(4)-H(4A)  | 0.9900   |
| C(4)-H(4AB) | 0.9900   |
| N(4)-C(14)  | 1.383(4) |
| C(5)-C(10)  | 1.401(4) |
| C(5)-C(6)   | 1.403(4) |
| C(6)-C(7)   | 1.384(4) |
| C(6)-H(6)   | 0.9500   |
| C(7)-C(8)   | 1.390(4) |
| C(7)-H(7)   | 0.9500   |
| C(8)-C(9)   | 1.392(4) |
| C(8)-C(11)  | 1.466(4) |
| C(9)-C(10)  | 1.389(4) |
| C(9)-H(9)   | 0.9500   |
| C(10)-H(10) | 0.9500   |

|              |          |
|--------------|----------|
| C(11)-C(12)  | 1.342(4) |
| C(11)-H(11)  | 0.9500   |
| O(11)-C(33)  | 1.415(4) |
| O(11)-C(31)  | 1.416(4) |
| N(11)-C(35)  | 1.402(3) |
| N(11)-C(34)  | 1.472(3) |
| N(11)-C(32)  | 1.474(4) |
| C(12)-C(19)  | 1.486(4) |
| O(12)-C(49)  | 1.200(4) |
| N(12)-C(43)  | 1.366(4) |
| N(12)-N(13)  | 1.371(3) |
| N(12)-C(42)  | 1.419(4) |
| C(14)-C(13)  | 1.390(4) |
| C(14)-C(15)  | 1.402(4) |
| N(14)-N(13)  | 1.301(4) |
| N(14)-C(44)  | 1.392(4) |
| C(13)-C(18)  | 1.397(4) |
| O(13)-C(49)  | 1.346(4) |
| O(13)-C(50)  | 1.459(4) |
| C(16)-C(15)  | 1.366(4) |
| C(16)-C(17)  | 1.413(5) |
| C(16)-H(16)  | 0.9500   |
| C(15)-H(15)  | 0.9500   |
| C(18)-C(17)  | 1.377(4) |
| C(18)-H(18)  | 0.9500   |
| C(17)-H(17)  | 0.9500   |
| C(20)-C(21)  | 1.505(5) |
| C(20)-H(20A) | 0.9900   |
| C(20)-H(20B) | 0.9900   |
| C(21)-H(21A) | 0.9800   |
| C(21)-H(21B) | 0.9800   |
| C(21)-H(21C) | 0.9800   |
| C(31)-C(32)  | 1.508(4) |
| C(31)-H(31A) | 0.9900   |
| C(31)-H(31B) | 0.9900   |
| C(32)-H(32A) | 0.9900   |

|              |          |
|--------------|----------|
| C(32)-H(32B) | 0.9900   |
| C(33)-C(34)  | 1.514(4) |
| C(33)-H(33A) | 0.9900   |
| C(33)-H(33B) | 0.9900   |
| C(34)-H(34A) | 0.9900   |
| C(34)-H(34B) | 0.9900   |
| C(35)-C(40)  | 1.401(4) |
| C(35)-C(36)  | 1.412(4) |
| C(36)-C(37)  | 1.382(4) |
| C(36)-H(36)  | 0.9500   |
| C(37)-C(38)  | 1.408(4) |
| C(37)-H(37)  | 0.9500   |
| C(38)-C(39)  | 1.395(4) |
| C(38)-C(41)  | 1.460(4) |
| C(39)-C(40)  | 1.386(4) |
| C(39)-H(39)  | 0.9500   |
| C(40)-H(40)  | 0.9500   |
| C(41)-C(42)  | 1.342(4) |
| C(41)-H(41)  | 0.9500   |
| C(42)-C(49)  | 1.490(4) |
| C(43)-C(44)  | 1.388(4) |
| C(43)-C(48)  | 1.392(4) |
| C(44)-C(45)  | 1.405(4) |
| C(45)-C(46)  | 1.364(5) |
| C(45)-H(45)  | 0.9500   |
| C(46)-C(47)  | 1.410(5) |
| C(46)-H(46)  | 0.9500   |
| C(47)-C(48)  | 1.380(4) |
| C(47)-H(47)  | 0.9500   |
| C(48)-H(48)  | 0.9500   |
| C(50)-C(51)  | 1.458(5) |
| C(50)-H(50A) | 0.9900   |
| C(50)-H(50B) | 0.9900   |
| C(51)-H(51A) | 0.9800   |
| C(51)-H(51B) | 0.9800   |
| C(51)-H(51C) | 0.9800   |

|                   |          |
|-------------------|----------|
| C(1)-O(1)-C(3)    | 108.8(2) |
| C(5)-N(1)-C(2)    | 116.7(2) |
| C(5)-N(1)-C(4)    | 116.7(2) |
| C(2)-N(1)-C(4)    | 112.4(2) |
| O(1)-C(1)-C(2)    | 111.7(2) |
| O(1)-C(1)-H(1A)   | 109.3    |
| C(2)-C(1)-H(1A)   | 109.3    |
| O(1)-C(1)-H(1AB)  | 109.3    |
| C(2)-C(1)-H(1AB)  | 109.3    |
| H(1A)-C(1)-H(1AB) | 107.9    |
| C(13)-N(2)-N(3)   | 110.1(2) |
| C(13)-N(2)-C(12)  | 128.6(2) |
| N(3)-N(2)-C(12)   | 121.3(2) |
| N(1)-C(2)-C(1)    | 110.9(3) |
| N(1)-C(2)-H(2A)   | 109.5    |
| C(1)-C(2)-H(2A)   | 109.5    |
| N(1)-C(2)-H(2AB)  | 109.5    |
| C(1)-C(2)-H(2AB)  | 109.5    |
| H(2A)-C(2)-H(2AB) | 108.1    |
| O(1)-C(3)-C(4)    | 111.4(3) |
| O(1)-C(3)-H(3A)   | 109.3    |
| C(4)-C(3)-H(3A)   | 109.3    |
| O(1)-C(3)-H(3AB)  | 109.3    |
| C(4)-C(3)-H(3AB)  | 109.3    |
| H(3A)-C(3)-H(3AB) | 108.0    |
| C(19)-O(3)-C(20)  | 116.4(2) |
| N(4)-N(3)-N(2)    | 108.8(2) |
| N(1)-C(4)-C(3)    | 111.1(2) |
| N(1)-C(4)-H(4A)   | 109.4    |
| C(3)-C(4)-H(4A)   | 109.4    |
| N(1)-C(4)-H(4AB)  | 109.4    |
| C(3)-C(4)-H(4AB)  | 109.4    |
| H(4A)-C(4)-H(4AB) | 108.0    |
| N(3)-N(4)-C(14)   | 108.2(2) |
| N(1)-C(5)-C(10)   | 121.9(2) |
| N(1)-C(5)-C(6)    | 121.2(2) |



|                   |          |
|-------------------|----------|
| C(10)-C(5)-C(6)   | 116.8(2) |
| C(7)-C(6)-C(5)    | 121.8(3) |
| C(7)-C(6)-H(6)    | 119.1    |
| C(5)-C(6)-H(6)    | 119.1    |
| C(6)-C(7)-C(8)    | 121.4(3) |
| C(6)-C(7)-H(7)    | 119.3    |
| C(8)-C(7)-H(7)    | 119.3    |
| C(7)-C(8)-C(9)    | 117.0(2) |
| C(7)-C(8)-C(11)   | 126.2(3) |
| C(9)-C(8)-C(11)   | 116.8(2) |
| C(10)-C(9)-C(8)   | 122.3(3) |
| C(10)-C(9)-H(9)   | 118.9    |
| C(8)-C(9)-H(9)    | 118.9    |
| C(9)-C(10)-C(5)   | 120.7(3) |
| C(9)-C(10)-H(10)  | 119.7    |
| C(5)-C(10)-H(10)  | 119.7    |
| C(12)-C(11)-C(8)  | 129.7(3) |
| C(12)-C(11)-H(11) | 115.1    |
| C(8)-C(11)-H(11)  | 115.1    |
| C(33)-O(11)-C(31) | 108.9(2) |
| C(35)-N(11)-C(34) | 116.3(2) |
| C(35)-N(11)-C(32) | 116.8(2) |
| C(34)-N(11)-C(32) | 111.8(2) |
| C(11)-C(12)-N(2)  | 122.1(2) |
| C(11)-C(12)-C(19) | 124.1(2) |
| N(2)-C(12)-C(19)  | 113.6(2) |
| C(43)-N(12)-N(13) | 110.0(2) |
| C(43)-N(12)-C(42) | 128.5(2) |
| N(13)-N(12)-C(42) | 120.9(2) |
| N(4)-C(14)-C(13)  | 108.8(2) |
| N(4)-C(14)-C(15)  | 130.6(3) |
| C(13)-C(14)-C(15) | 120.5(3) |
| N(13)-N(14)-C(44) | 108.4(2) |
| N(2)-C(13)-C(14)  | 104.2(2) |
| N(2)-C(13)-C(18)  | 132.5(3) |
| C(14)-C(13)-C(18) | 123.3(2) |

|                     |          |
|---------------------|----------|
| C(49)-O(13)-C(50)   | 117.8(3) |
| N(14)-N(13)-N(12)   | 108.7(2) |
| C(15)-C(16)-C(17)   | 121.9(3) |
| C(15)-C(16)-H(16)   | 119.1    |
| C(17)-C(16)-H(16)   | 119.1    |
| C(16)-C(15)-C(14)   | 116.8(3) |
| C(16)-C(15)-H(15)   | 121.6    |
| C(14)-C(15)-H(15)   | 121.6    |
| C(17)-C(18)-C(13)   | 115.1(3) |
| C(17)-C(18)-H(18)   | 122.4    |
| C(13)-C(18)-H(18)   | 122.4    |
| C(18)-C(17)-C(16)   | 122.3(3) |
| C(18)-C(17)-H(17)   | 118.8    |
| C(16)-C(17)-H(17)   | 118.8    |
| O(2)-C(19)-O(3)     | 124.5(2) |
| O(2)-C(19)-C(12)    | 122.8(3) |
| O(3)-C(19)-C(12)    | 112.7(2) |
| O(3)-C(20)-C(21)    | 110.7(2) |
| O(3)-C(20)-H(20A)   | 109.5    |
| C(21)-C(20)-H(20A)  | 109.5    |
| O(3)-C(20)-H(20B)   | 109.5    |
| C(21)-C(20)-H(20B)  | 109.5    |
| H(20A)-C(20)-H(20B) | 108.1    |
| C(20)-C(21)-H(21A)  | 109.5    |
| C(20)-C(21)-H(21B)  | 109.5    |
| H(21A)-C(21)-H(21B) | 109.5    |
| C(20)-C(21)-H(21C)  | 109.5    |
| H(21A)-C(21)-H(21C) | 109.5    |
| H(21B)-C(21)-H(21C) | 109.5    |
| O(11)-C(31)-C(32)   | 111.5(2) |
| O(11)-C(31)-H(31A)  | 109.3    |
| C(32)-C(31)-H(31A)  | 109.3    |
| O(11)-C(31)-H(31B)  | 109.3    |
| C(32)-C(31)-H(31B)  | 109.3    |
| H(31A)-C(31)-H(31B) | 108.0    |
| N(11)-C(32)-C(31)   | 110.7(3) |

|                     |          |
|---------------------|----------|
| N(11)-C(32)-H(32A)  | 109.5    |
| C(31)-C(32)-H(32A)  | 109.5    |
| N(11)-C(32)-H(32B)  | 109.5    |
| C(31)-C(32)-H(32B)  | 109.5    |
| H(32A)-C(32)-H(32B) | 108.1    |
| O(11)-C(33)-C(34)   | 111.3(3) |
| O(11)-C(33)-H(33A)  | 109.4    |
| C(34)-C(33)-H(33A)  | 109.4    |
| O(11)-C(33)-H(33B)  | 109.4    |
| C(34)-C(33)-H(33B)  | 109.4    |
| H(33A)-C(33)-H(33B) | 108.0    |
| N(11)-C(34)-C(33)   | 110.6(2) |
| N(11)-C(34)-H(34A)  | 109.5    |
| C(33)-C(34)-H(34A)  | 109.5    |
| N(11)-C(34)-H(34B)  | 109.5    |
| C(33)-C(34)-H(34B)  | 109.5    |
| H(34A)-C(34)-H(34B) | 108.1    |
| C(40)-C(35)-N(11)   | 122.3(2) |
| C(40)-C(35)-C(36)   | 117.1(2) |
| N(11)-C(35)-C(36)   | 120.6(2) |
| C(37)-C(36)-C(35)   | 121.5(3) |
| C(37)-C(36)-H(36)   | 119.2    |
| C(35)-C(36)-H(36)   | 119.2    |
| C(36)-C(37)-C(38)   | 121.2(3) |
| C(36)-C(37)-H(37)   | 119.4    |
| C(38)-C(37)-H(37)   | 119.4    |
| C(39)-C(38)-C(37)   | 117.0(2) |
| C(39)-C(38)-C(41)   | 117.4(3) |
| C(37)-C(38)-C(41)   | 125.7(2) |
| C(40)-C(39)-C(38)   | 122.2(3) |
| C(40)-C(39)-H(39)   | 118.9    |
| C(38)-C(39)-H(39)   | 118.9    |
| C(39)-C(40)-C(35)   | 120.9(3) |
| C(39)-C(40)-H(40)   | 119.5    |
| C(35)-C(40)-H(40)   | 119.5    |
| C(42)-C(41)-C(38)   | 130.4(3) |

|                     |          |
|---------------------|----------|
| C(42)-C(41)-H(41)   | 114.8    |
| C(38)-C(41)-H(41)   | 114.8    |
| C(41)-C(42)-N(12)   | 122.6(2) |
| C(41)-C(42)-C(49)   | 123.5(3) |
| N(12)-C(42)-C(49)   | 113.6(2) |
| N(12)-C(43)-C(44)   | 104.6(2) |
| N(12)-C(43)-C(48)   | 132.7(3) |
| C(44)-C(43)-C(48)   | 122.7(3) |
| C(43)-C(44)-N(14)   | 108.4(2) |
| C(43)-C(44)-C(45)   | 121.0(3) |
| N(14)-C(44)-C(45)   | 130.6(3) |
| C(46)-C(45)-C(44)   | 116.6(3) |
| C(46)-C(45)-H(45)   | 121.7    |
| C(44)-C(45)-H(45)   | 121.7    |
| C(45)-C(46)-C(47)   | 122.1(3) |
| C(45)-C(46)-H(46)   | 119.0    |
| C(47)-C(46)-H(46)   | 119.0    |
| C(48)-C(47)-C(46)   | 121.8(3) |
| C(48)-C(47)-H(47)   | 119.1    |
| C(46)-C(47)-H(47)   | 119.1    |
| C(47)-C(48)-C(43)   | 115.8(3) |
| C(47)-C(48)-H(48)   | 122.1    |
| C(43)-C(48)-H(48)   | 122.1    |
| O(12)-C(49)-O(13)   | 125.3(3) |
| O(12)-C(49)-C(42)   | 122.6(3) |
| O(13)-C(49)-C(42)   | 112.1(2) |
| C(51)-C(50)-O(13)   | 111.2(3) |
| C(51)-C(50)-H(50A)  | 109.4    |
| O(13)-C(50)-H(50A)  | 109.4    |
| C(51)-C(50)-H(50B)  | 109.4    |
| O(13)-C(50)-H(50B)  | 109.4    |
| H(50A)-C(50)-H(50B) | 108.0    |
| C(50)-C(51)-H(51A)  | 109.5    |
| C(50)-C(51)-H(51B)  | 109.5    |
| H(51A)-C(51)-H(51B) | 109.5    |
| C(50)-C(51)-H(51C)  | 109.5    |

H(51A)-C(51)-H(51C) 109.5  
H(51B)-C(51)-H(51C) 109.5

Symmetry transformations used to generate equivalent atoms:

**Table S11.** Anisotropic displacement parameters ( $\text{\AA}^2 \times 10^3$ ) for **7d** derivative. The anisotropic displacement factor exponent takes the form:  $-2\pi^2 [h^2 a^{*2} U^{11} + \dots + 2 h k a^* b^* U^{12}]$ .

|       | U <sup>11</sup> | U <sup>22</sup> | U <sup>33</sup> | U <sup>23</sup> | U <sup>13</sup> | U <sup>12</sup> |
|-------|-----------------|-----------------|-----------------|-----------------|-----------------|-----------------|
| O(1)  | 15(1)           | 41(1)           | 26(1)           | -1(1)           | -3(1)           | 4(1)            |
| N(1)  | 15(1)           | 26(1)           | 19(1)           | -3(1)           | -1(1)           | 0(1)            |
| C(1)  | 20(1)           | 34(2)           | 28(2)           | -7(1)           | 2(1)            | 3(1)            |
| O(2)  | 24(1)           | 39(1)           | 26(1)           | -9(1)           | 7(1)            | -4(1)           |
| N(2)  | 18(1)           | 18(1)           | 18(1)           | 0(1)            | 1(1)            | 1(1)            |
| C(2)  | 22(1)           | 31(2)           | 28(1)           | -7(1)           | 1(1)            | 1(1)            |
| C(3)  | 17(1)           | 41(2)           | 27(1)           | -9(1)           | 2(1)            | -1(1)           |
| O(3)  | 16(1)           | 35(1)           | 22(1)           | -4(1)           | 2(1)            | -6(1)           |
| N(3)  | 28(1)           | 19(1)           | 24(1)           | 3(1)            | -2(1)           | 0(1)            |
| C(4)  | 16(1)           | 40(2)           | 27(1)           | -10(1)          | 1(1)            | -4(1)           |
| N(4)  | 32(1)           | 21(1)           | 25(1)           | 1(1)            | -4(1)           | -3(1)           |
| C(5)  | 14(1)           | 27(2)           | 14(1)           | 1(1)            | -3(1)           | 1(1)            |
| C(6)  | 19(1)           | 24(2)           | 21(1)           | -2(1)           | 2(1)            | -4(1)           |
| C(7)  | 22(1)           | 25(2)           | 21(1)           | -3(1)           | 2(1)            | 0(1)            |
| C(8)  | 16(1)           | 25(2)           | 18(1)           | 1(1)            | -1(1)           | 0(1)            |
| C(9)  | 17(1)           | 28(2)           | 26(2)           | -6(1)           | -1(1)           | -4(1)           |
| C(10) | 18(1)           | 27(2)           | 25(1)           | -7(1)           | 0(1)            | 1(1)            |
| C(11) | 17(1)           | 22(2)           | 19(1)           | 0(1)            | -1(1)           | 0(1)            |
| O(11) | 16(1)           | 41(1)           | 28(1)           | -3(1)           | 0(1)            | 6(1)            |
| N(11) | 15(1)           | 29(1)           | 22(1)           | -4(1)           | 1(1)            | 0(1)            |
| C(12) | 18(1)           | 23(2)           | 18(1)           | 1(1)            | -2(1)           | -2(1)           |
| O(12) | 27(1)           | 47(1)           | 27(1)           | 2(1)            | 8(1)            | 6(1)            |
| N(12) | 18(1)           | 20(1)           | 19(1)           | 1(1)            | 1(1)            | 3(1)            |
| C(14) | 19(1)           | 20(1)           | 19(1)           | -2(1)           | 2(1)            | 0(1)            |
| N(14) | 38(1)           | 22(1)           | 24(1)           | 0(1)            | -1(1)           | 0(1)            |

|       |       |       |       |        |        |        |
|-------|-------|-------|-------|--------|--------|--------|
| C(13) | 17(1) | 20(1) | 15(1) | -2(1)  | 2(1)   | 1(1)   |
| O(13) | 17(1) | 30(1) | 53(1) | -2(1)  | 8(1)   | -5(1)  |
| N(13) | 31(1) | 20(1) | 25(1) | 1(1)   | 0(1)   | 4(1)   |
| C(16) | 28(2) | 31(2) | 28(1) | -6(1)  | -9(1)  | 2(1)   |
| C(15) | 27(1) | 23(2) | 24(1) | -5(1)  | 0(1)   | -3(1)  |
| C(18) | 29(2) | 21(2) | 30(1) | -2(1)  | -5(1)  | 1(1)   |
| C(17) | 41(2) | 24(2) | 32(2) | 1(1)   | -12(1) | 6(1)   |
| C(19) | 20(1) | 24(1) | 18(1) | 0(1)   | -1(1)  | 2(1)   |
| C(20) | 14(1) | 38(2) | 26(1) | -2(1)  | 3(1)   | -5(1)  |
| C(21) | 33(2) | 40(2) | 32(2) | 2(1)   | 7(1)   | -6(2)  |
| C(31) | 22(2) | 39(2) | 28(2) | -8(1)  | 2(1)   | 4(1)   |
| C(32) | 21(2) | 32(2) | 32(2) | -9(1)  | 5(1)   | 0(1)   |
| C(33) | 18(1) | 41(2) | 31(2) | -8(1)  | 1(1)   | -2(1)  |
| C(34) | 17(1) | 44(2) | 27(1) | -11(1) | 2(1)   | -2(1)  |
| C(35) | 17(1) | 27(2) | 19(1) | -1(1)  | -1(1)  | 1(1)   |
| C(36) | 18(1) | 24(2) | 23(1) | 0(1)   | 2(1)   | -3(1)  |
| C(37) | 20(1) | 21(1) | 20(1) | -2(1)  | 2(1)   | 0(1)   |
| C(38) | 15(1) | 25(2) | 18(1) | 0(1)   | -2(1)  | 1(1)   |
| C(39) | 17(1) | 27(2) | 27(2) | -6(1)  | -3(1)  | -3(1)  |
| C(40) | 18(1) | 26(2) | 28(1) | -8(1)  | -2(1)  | -1(1)  |
| C(41) | 17(1) | 21(2) | 21(1) | 3(1)   | -4(1)  | 1(1)   |
| C(42) | 16(1) | 21(2) | 22(1) | 4(1)   | -1(1)  | 1(1)   |
| C(43) | 18(1) | 22(1) | 20(1) | 1(1)   | 4(1)   | 0(1)   |
| C(44) | 24(1) | 22(1) | 20(1) | -1(1)  | 5(1)   | -2(1)  |
| C(45) | 38(2) | 31(2) | 22(2) | -1(1)  | 0(1)   | -10(1) |
| C(46) | 36(2) | 37(2) | 23(1) | 1(1)   | -8(1)  | -9(1)  |
| C(47) | 32(2) | 31(2) | 33(2) | 3(1)   | -12(1) | -1(1)  |
| C(48) | 22(1) | 24(2) | 32(2) | 0(1)   | -4(1)  | 2(1)   |
| C(49) | 19(1) | 25(2) | 28(2) | 9(1)   | 3(1)   | 3(1)   |
| C(50) | 21(2) | 38(2) | 68(2) | 8(2)   | 12(2)  | -5(2)  |
| C(51) | 40(2) | 42(2) | 70(3) | 12(2)  | 26(2)  | 1(2)   |

---

**Table S12.** Hydrogen coordinates ( $\times 10^4$ ) and isotropic displacement parameters ( $\text{\AA}^2 \times 10^3$ ) for **7d** derivatives.

|        | x     | y     | z    | U(eq) |
|--------|-------|-------|------|-------|
| H(1A)  | 7267  | 3659  | 5177 | 33    |
| H(1AB) | 7026  | 5980  | 5035 | 33    |
| H(2A)  | 7895  | 5842  | 4510 | 32    |
| H(2AB) | 8339  | 5343  | 4914 | 32    |
| H(3A)  | 6458  | 966   | 4417 | 34    |
| H(3AB) | 6938  | 748   | 4819 | 34    |
| H(4A)  | 7756  | 229   | 4281 | 33    |
| H(4AB) | 7503  | 2440  | 4090 | 33    |
| H(6)   | 8839  | -193  | 4138 | 26    |
| H(7)   | 10049 | -348  | 3870 | 27    |
| H(9)   | 10528 | 5355  | 4339 | 28    |
| H(10)  | 9316  | 5550  | 4608 | 28    |
| H(11)  | 11504 | 3697  | 4008 | 23    |
| H(16)  | 9203  | -1003 | 2327 | 34    |
| H(15)  | 9645  | -3861 | 2695 | 30    |
| H(18)  | 10549 | 3134  | 2937 | 32    |
| H(17)  | 9652  | 2416  | 2439 | 39    |
| H(20A) | 13685 | 2402  | 3396 | 31    |
| H(20B) | 13823 | 3811  | 3784 | 31    |
| H(21A) | 13958 | 6070  | 3259 | 53    |
| H(21B) | 13149 | 6638  | 3450 | 53    |
| H(21C) | 13191 | 5235  | 3056 | 53    |
| H(31A) | 5324  | -1175 | 5001 | 35    |
| H(31B) | 5110  | 1166  | 4858 | 35    |
| H(32A) | 4024  | -426  | 5126 | 34    |
| H(32B) | 4467  | -929  | 5530 | 34    |
| H(33A) | 5479  | 4045  | 5213 | 36    |
| H(33B) | 5961  | 3791  | 5614 | 36    |
| H(34A) | 4894  | 2415  | 5945 | 35    |
| H(34B) | 4674  | 4659  | 5756 | 35    |
| H(36)  | 3581  | 5310  | 5861 | 26    |

|        |       |       |      |    |
|--------|-------|-------|------|----|
| H(37)  | 2383  | 5600  | 6140 | 25 |
| H(39)  | 1852  | -232  | 5732 | 29 |
| H(40)  | 3052  | -549  | 5455 | 29 |
| H(41)  | 896   | 1592  | 6053 | 24 |
| H(45)  | 2588  | 9376  | 7411 | 36 |
| H(46)  | 3252  | 6540  | 7680 | 38 |
| H(47)  | 3044  | 3086  | 7463 | 39 |
| H(48)  | 2135  | 2326  | 6974 | 32 |
| H(50A) | -1251 | 2880  | 6667 | 51 |
| H(50B) | -1401 | 1572  | 6268 | 51 |
| H(51A) | -1526 | -744  | 6768 | 76 |
| H(51B) | -750  | 25    | 6970 | 76 |
| H(51C) | -726  | -1280 | 6564 | 76 |

---



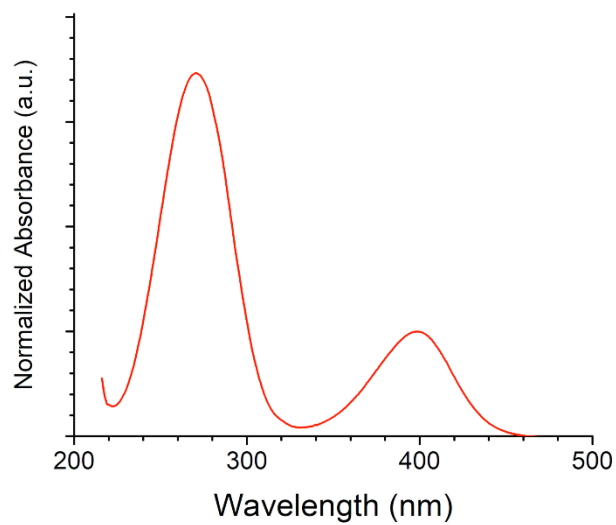

**Fig S20.** Absorption spectra of **6b** derivative

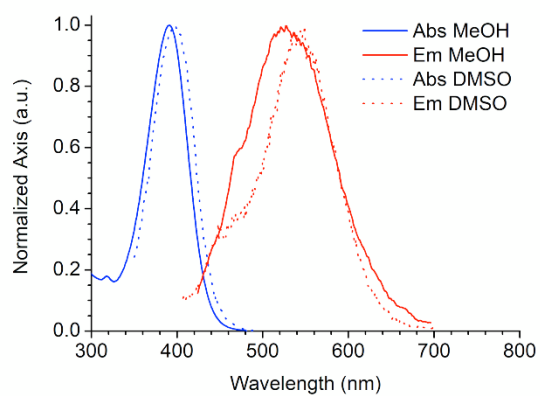

**Fig S21.** Absorption and emission spectra of **6a** derivative  
in (solid line) methanol and (dot line) DMSO solution
